# Supplementary material for: Primordial neon and the deep mantle origin of kimberlites
Source: Nat Commun. 2025 Apr 6;16:3281. doi: 10.1038/s41467-025-58625-5 (PMC11972409; doi:10.1038/s41467-025-58625-5)
Supplement: Supplementary file 4 — Supplementary Data 1 [file 41467_2025_58625_MOESM4_ESM.xlsx]

## Sheet: Sheet1
Supplementary Table S1. List of samples, including analysed material and kimbrelite emplacement age.
sample	type of material	locality	lon	lat	region	craton	age (Ma)	analysed at		contaminated	comment
								Woods Hole	SUERC
BLFX-12	megacryst	Bultfontein, Kimberley	24.787	-28.7737	South Africa	Kaapvaal	88	x	x	n
WESK-8	kimberlite	Wesselton, Kimberley	24.83	-28.766	South Africa	Kaapvaal	90	x	x	y / n
ROM-250-01	megacryst	Monastery	27.5	-28.9	Lesotho	Kaapvaal	89	x		n
KB14-01	kimberlite	Letseng	28.2881	-28.8421	Lesotho	Kaapvaal	92	x		n
AK6-S	kimberlite	Karowe	25.4722	-21.5008	Botswana	Zimbabwe	94	x		n
Murowa M3	kimberlite	Murowa	30.5	-20.4167	Zimbabwe	Zimbabwe	540	x		n
IGWK-2	kimberlite	Igwisi Hills	31.933	-4.889	Tanzania	Tanzania	0.01	x		n
DZA-002 391.85	kimberlite	Koidu	-10.9501	8.64228	Sierra Leone	Man	145	x		n
TG12-176	kimberlite	Tonguma	-11.1011	8.19999	Sierra Leone	Man	137	x		n
BV1	kimberlite	Boa, Lac de Gras	-110.66	64.6816	western Canada	Slave	63	x	x	y
BV14	kimberlite	Leslie, Lac de Gras	-110.66	64.6816	western Canada	Slave	53	x	x	n
J-GP	kimberlite	Jericho	-110.799	65.807	western Canada	Slave	173	x		n	2 fractions: coarse and fine-grained
MPV-04-193C 99.85	kimberlite	Pipe 5034, Ghacho Kue	-109.208	63.4353	western Canada	Slave	542	x	x	y
Victor	kimberlite	Victor	-83.8405	52.79	eastern Canada	Superior	177	x		n	2 fractions: repeat
UV-1	kimberlite	Udachnaya	112.314	66.455	Siberia	Siberia	367	x		n	4 fractions: dark, light, fine-grained, repeat (mix)
1149	kimberlite	Maniitsoq	-51.986	65.0224	West Greenland	North Atlantic	558	x		n
527	kimberlite	Maniitsoq	-52.2976	65.1823	West Greenland	North Atlantic	558	x	x	y / n
1072	kimberlite	Maniitsoq	-51.5647	65.1947	West Greenland	North Atlantic	558	x		n
SSARU-1	kimberlite	Sarfartoq	n/a	n/a	West Greenland	North Atlantic	578	x		n
L5C	kimberlite	Sarfartoq	n/a	n/a	West Greenland	North Atlantic	578	x		n
P1K1	kimberlite	Pipe 1	28.6246	62.9066	Finland	Baltic	582	x		n
