# Supplementary material for: Primordial neon and the deep mantle origin of kimberlites
Source: Nat Commun. 2025 Apr 6;16:3281. doi: 10.1038/s41467-025-58625-5 (PMC11972409; doi:10.1038/s41467-025-58625-5)
Supplement: Supplementary file 5 — Supplementary Data 2 [file 41467_2025_58625_MOESM5_ESM.xlsx]

## Sheet: Sheet1
Supplementary Table S2. He-Ne-Ar concentrations and isotopic compositions for olivine in kimberlites
																Ne isotope ratios quantified only when 20Ne > 6E-12 cc
sample	lab	lab name	locality	age	contamination	Weight	4He	4He	3He	4He/3He	3He/4He	3He/4He		20Ne	20Ne	20Ne/22Ne	20Ne/22Ne	21Ne/22Ne	21Ne/22Ne		40Ar	40Ar	40Ar/36Ar	40Ar/36Ar
				(Ma)	by groundmass	(g)	(ccSTP)	(ccSTP/g)	(ccSTP/g)		(R/Ra)	(R/Ra)		cc STP	cc STP/g						cc STP	cc STP/g
												1 sigma					1 sigma		1 sigma					1 sigma
BLFX-12	SUERC	BLFX-12 SUERC	Bultfontein, Kimberley	88		0.273		2.60154e-08	1.19139e-13	218361	3.31853	0.17
BLFX-12	Woods Hole	Crs2-AG-BLFX-12-ol-5x	Bultfontein, Kimberley	88		1.09156	2.2952e-08	2.10267e-08	1.02371e-13	205398	3.52797	0.13929		9.2307e-13	8.45643e-13						7.22051e-09	6.61485e-09	2087.97	27.3
		Crs2-AG-BLFX-12-ol-40x		88		1.09156	3.12723e-08	7.35441e-08	3.83678e-13	191682	3.78042	0.164391		2.01305e-12	1.84419e-12						2.24787e-08	2.05931e-08	2490.32	139.5
		total		88				9.45708e-08	4.86049e-13	194571	3.72429				2.68983e-12							2.7208e-08
WESK-8	Woods Hole	Crs1-AG-WESK-8-ol-5x	Wesselton, Kimberley	90		0.7982	2.50802e-09	1.8974e-07	7.44652e-13	254803	2.84391	0.336477		6.4046e-12	8.0238e-12	10.6436	0.230841	0.0432286	0.00179039		6.49193e-08	8.13321e-08	4977.37	209.8
		Crs1-AG-WESK-8-ol-40x		90		0.7982	9.10037e-09	6.88473e-07	2.94177e-12	234034	3.0963	0.210017		1.83953e-11	2.30459e-11	10.9114	0.0998468	0.0452032	0.00132511		2.39072e-07	2.99514e-07	5574.16	299.2
		Crs1-AG-WESK-8-ol-80x		90		0.7982	3.31079e-09	2.50473e-07	1.03237e-12	242618	2.98674	0.243733		5.73036e-12	7.1791e-12						8.62558e-08	1.08063e-07	5645.14	161.2
		total		90				1.12869e-06	4.71879e-12	239189	3.02956				3.82488e-11							4.88909e-07
WESK-8	SUERC	WESK-8 SUERC	Wesselton, Kimberley	90		0.274		4.00947e-07	1.90234e-12	210765	3.43813	0.04
WESK-8	SUERC	WESK-8 serp SUERC	Wesselton, Kimberley	90	y	0.274		1.282e-06	2.89e-12	443599	1.63354	0.02
ROM-250-01	Woods Hole	Crs3-AG-ROM-250-01-ol-40x	Monastery	89		0.84621	2.12712e-08	6.45281e-08	5.17158e-13	124775	5.80758	0.418338		1.74423e-10	2.06123e-10	9.78476	0.0703029	0.0292188	0.000648918		1.13788e-07	1.34468e-07	330.776	1.6
		Crs3-AG-ROM-250-01-ol-40x		89		0.84621	2.21285e-08	3.63586e-08	3.01187e-13	120718	6.00275	0.428469		6.53087e-12	7.71778e-12	9.83064	0.132948	0.0289712	0.001713		1.14562e-08	1.35382e-08	437.642	9.9
		total		89				1.00887e-07	8.18345e-13	123281	5.87792				2.1384e-10							1.48006e-07
KB14-01	Woods Hole	Crs3-AG-KB14-01-ol-10x	Letseng	92		0.40255	2.2218e-08	1.41684e-07	9.39748e-13	150768	4.8063	0.13777		8.3867e-12	2.08339e-11	10.225	0.063674	0.0394145	0.00158508		7.12477e-08	1.76991e-07	1549.1	23.4
		Crs3-AG-KB14-01-ol-20x		92		0.40255	1.74283e-08	1.1114e-07	7.30231e-13	152199	4.76112	0.146351		3.60651e-12	8.95917e-12						4.71481e-08	1.17124e-07	2121.51	47.9
		total		92				2.52825e-07	1.66998e-12	151394	4.78644				2.97931e-11							2.94114e-07
AK6-S	Woods Hole	Crs1-AG-AK6-5-ol-10x	Karowe	94		0.49272	2.91853e-08	1.52055e-07	1.21672e-12	124971	5.79847	0.262458		1.24646e-11	2.52976e-11	10.0315	0.0893497	0.0367323	0.00142263		1.12625e-07	2.28579e-07	1038.13	8.8
		Crs1-AG-AK6-5-ol-20x		94		0.49272	2.26455e-08	1.17982e-07	9.45542e-13	124778	5.80744	0.268958		6.65744e-12	1.35116e-11	10.3782	0.145877	0.0410148	0.00196922		8.6047e-08	1.74637e-07	1141.87	15.2
		total		94				2.70037e-07	2.16227e-12	124886	5.80239				3.88092e-11							4.03216e-07
IGWK-2	Woods Hole	Crs2-AG-IGWK-2-ol-40x	Igwisi Hills	0.01		0.88811	1.416e-08	9.62801e-07	6.07001e-12	158616	4.5685	0.266476		4.43659e-10	4.99555e-10	9.98936	0.0702139	0.0312095	0.000461003		8.71907e-07	9.81756e-07	1406.41	13.1
		Crs2-AG-IGWK-2-ol-40x		0.01		0.88811	4.6161e-09	3.13869e-07	1.93315e-12	162361	4.46312	0.396485		4.81308e-11	5.41947e-11	10.2735	0.0721137	0.0363641	0.000873202		2.62999e-07	2.96133e-07	3616.43	153.5
		total		0.01				1.27667e-06	8.00316e-12	159521	4.54259				5.53749e-10							1.27789e-06
Murowa M3	Woods Hole	Crs1-AG-M3-ol-49224-10x	Murowa	540		0.49224	1.08518e-08	6.91957e-06	7.69575e-13	8.99142e+06	0.0805922	0.00975784		3.04831e-12	6.19274e-12						6.36089e-08	1.29223e-07	8105.28	1400.3
		Crs1-AG-M3-ol-49224-20x		540		0.49224	6.95232e-09	4.4331e-06	7.78714e-13	5.69285e+06	0.127289	0.0177428		1.7823e-12	3.62079e-12						3.54475e-08	7.20126e-08	4895.4	256.7
		total		540				1.13527e-05	1.54829e-12	7.3324e+06	0.0988269				9.81352e-12							2.01236e-07
DZA-002 391.85	Woods Hole	Crs2-AG-DZA-002-ol-46744-10x	Koidu	145		0.46744	6.26169e-09	8.0892e-07	2.26617e-12	356955	2.03006	0.0852157		8.56639e-12	1.83262e-11	11.376	0.149783	0.0497976	0.00116997		1.52498e-07	3.26241e-07	11134.8	308
		Crs2-AG-DZA-002-ol-46744-20x		145		0.46744	4.256e-09	5.49813e-07	1.59433e-12	344854	2.10129	0.0821647		4.93133e-12	1.05497e-11						8.51217e-08	1.82102e-07	10201.1	812.3
		total		145				1.35873e-06	3.8605e-12	351957	2.05888				2.88758e-11							5.08343e-07
TG12-176	Woods Hole	Crs3-AG-TG12-176-ol-51858-10x	Tonguma	137		0.51858	2.98051e-09	1.80397e-06	2.28659e-12	788932	0.918504	0.0741198		1.12912e-11	2.17734e-11	10.9664	0.131505	0.0468604	0.00127094		1.48563e-07	2.8648e-07	5136.99	99.9
		Crs3-AG-TG12-176-ol-20x		137		0.51858	5.57676e-09	6.49391e-07	9.44639e-13	687448	1.0541	0.0484967		7.25527e-12	1.39906e-11	10.7414	0.0933996	0.0401302	0.00182335		7.09341e-08	1.36785e-07	3790.28	105.3
		total		137				2.45336e-06	3.23123e-12	759264	0.954395				3.5764e-11							4.23265e-07
BV1	SUERC	BV1 SUERC	Boa, Lac de Gras	63	y	0.26		1.27387e-07	8.20267e-13	155300	4.66607	0.1
BV1	Woods Hole	Crs2-AG-BV1-ol-40x	Boa, Lac de Gras	63	y	1.62243	5.48628e-09	2.04198e-07	1.29954e-12	157131	4.61169	0.318812		1.2557e-10	7.73964e-11	10.0947	0.0578756	0.0329954	0.000625051		7.26881e-07	4.4802e-07	2832.74	55
		Crs2-AG-BV1-ol-40x		63		1.62243	2.0811e-09	7.74579e-08	5.04395e-13	153566	4.71874	0.321714		2.41019e-11	1.48554e-11	10.4344	0.0835372	0.037862	0.00077739		2.60558e-07	1.60597e-07	4286.5	218.2
		Crs2-AG-BV1-ol-80x		63		1.62243	2.55357e-08	4.04034e-08	2.87363e-13	140600	5.15389	0.294192		1.08024e-11	6.65814e-12	10.3724	0.147732	0.0383034	0.00125945		1.34777e-07	8.30712e-08	4218.13	82
		total		63				3.22059e-07	2.0913e-12	153999	4.70546				9.89099e-11							6.91688e-07
BV1	Woods Hole	Crs3-AG-BV1-serpent-ol-40x	Boa, Lac de Gras	63	y	0.60614	6.60255e-09	6.57777e-07	4.43389e-12	148352	4.88458	0.274491		1.90731e-10	3.14664e-10	10.0827	0.0325459	0.0332482	0.000435712		1.09034e-06	1.79882e-06	2846.28	36.6
		Crs3-AG-BV1-serpent-ol-40x		63		0.60614	1.69068e-09	1.68434e-07	1.09747e-12	153474	4.72157	0.34815		2.61948e-11	4.32157e-11	10.373	0.0492939	0.0365794	0.000590736		2.72516e-07	4.49592e-07	4272.37	246
		total		63				8.2621e-07	5.53137e-12	149368	4.85135				5.557e-10							2.24841e-06
BV14	SUERC	BV14 SUERC	Leslie, Lac de Gras	53		0.282		5.01362e-08	2.80174e-13	178947	4.04946	0.11
BV14	Woods Hole	Crs3-AG-BV14-ol-40x	Leslie, Lac de Gras	53		0.78199	2.00371e-09	1.54729e-07	1.11097e-12	139275	5.20295	0.455742		1.6513e-11	2.11166e-11	10.605	0.15754	0.0396387	0.0013644		2.57403e-07	3.29165e-07	6443.32	414.4
		Crs3-AG-BV14-ol-80x		53		0.78199	1.5979e-08	5.24548e-08	3.83477e-13	136787	5.29755	0.346226		3.99556e-12	5.10948e-12						7.95166e-08	1.01685e-07	6318.52	288
		total		53				2.07184e-07	1.49444e-12	138636	5.2269				2.62261e-11							4.30849e-07
J-GP	Woods Hole	Crs1-AG-J-GP-C-ol-99509-10x	Jericho	173		0.99509	1.78074e-09	1.08064e-07	6.17816e-13	174912	4.14287	0.25625		6.51117e-11	6.5433e-11	9.67527	0.0658143	0.0305385	0.000591784		2.35437e-07	2.36599e-07	818.037	14.6
		Crs1-AG-J-GP-C-ol-99509-20x		173		0.99509	1.41166e-09	8.5666e-08	5.03586e-13	170112	4.25977	0.170676		1.94781e-11	1.95742e-11	9.87279	0.0783073	0.0350859	0.00100599		1.32229e-07	1.32882e-07	2070.78	22
		total		173				1.93729e-07	1.1214e-12	172757	4.19456				8.50073e-11							3.69481e-07
J-GP	Woods Hole	Crs2-AG-J-GP-F-ol-66530-10x	Jericho	173		0.6653	1.56095e-09	1.41681e-07	7.53308e-13	188078	3.85285	0.238112		4.14663e-11	6.23272e-11	9.76025	0.0508135	0.0319758	0.000616328		1.84377e-07	2.77134e-07	1047.89	8.2
		Crs2-AG-J-GP-F-ol-66530-20x		173		0.6653	2.74078e-08	1.05753e-07	5.92757e-13	178409	4.06168	0.152355		1.58667e-11	2.38489e-11	10.0935	0.0962356	0.0383931	0.0011449		1.24348e-07	1.86905e-07	2146.51	23.9
		total		173				2.47434e-07	1.34607e-12	183820	3.9421				8.61762e-11							4.64039e-07
MPV-04-193C 99.85	SUERC	04-164c SUERC	Ghacho Kue	542	y	0.122		1.1738e-07	3.70701e-13	316644	2.28849	0.11
MPV-04-193C 99.85	Woods Hole	Crs1-AG-MPV-04-193-ol-10x	Ghacho Kue	542	y	0.63598	1.59405e-09	1.51356e-07	4.48319e-13	337607	2.14639	0.12636		6.67082e-12	1.0489e-11	10.2321	0.173809	0.0345897	0.00197653		4.84403e-08	7.61664e-08	667.277	8.7
		Crs1-AG-MPV-04-193-ol-20x		542		0.63598	2.03585e-09	1.93305e-07	5.75239e-13	336042	2.15639	0.0907745		6.56535e-12	1.03232e-11	9.80623	0.174875	0.0364601	0.00155907		4.91164e-08	7.72295e-08	794.153	11.1
		total		542				3.44661e-07	1.02356e-12	336728	2.152				2.08122e-11							1.53396e-07
Victor	Woods Hole	Crs3-AG-VICTOR-ol-10x	Victor	177		0.89476	1.99236e-09	1.34463e-07	1.05225e-12	127786	5.67072	0.319563		1.06022e-11	1.18492e-11	11.5497	0.0914727	0.041757	0.00154782		9.25744e-08	1.03463e-07	5262.99	139.2
		Crs3-AG-VICTOR-ol-20x		177		0.89476	1.66004e-09	1.12034e-07	9.01721e-13	124245	5.83233	0.322765		8.08827e-12	9.03959e-12	11.6646	0.131256	0.0410043	0.00183463		7.42746e-08	8.30106e-08	5777.04	170.2
		total		177				2.46497e-07	1.95397e-12	126152	5.74417				2.08888e-11							1.86473e-07
Victor	Woods Hole	Crs2-AG-VICTOR--ol-40x	Victor	177		1.10655	5.73494e-09	3.12966e-07	2.33937e-12	133782	5.41654	0.15423		3.21657e-11	2.90684e-11	11.3307	0.0909859	0.0414254	0.000877444		2.72115e-07	2.45913e-07	4464.84	444.2
UV-1	Woods Hole	Crs1-AG-UV-1D-ol-10x	Udachnaya	367		0.6543	3.07143e-09	2.83468e-07	2.01669e-12	140561	5.15533	0.18591		3.40051e-11	5.19717e-11	10.4594	0.0708306	0.0347364	0.000626735		1.9645e-07	3.00244e-07	3040.92	133.8
		Crs1-AG-UV-1D-ol-10x		367		0.6543	1.48848e-09	1.37374e-07	1.07518e-12	127768	5.6715	0.190249		7.7277e-12	1.18106e-11	11.057	0.114188	0.0407139	0.00147662		8.34918e-08	1.27605e-07	6417.36	195.4
		Crs1-AG-UV-1D-ol-40x		367		0.6543	1.89276e-09	1.74686e-07	1.27129e-12	137409	5.27357	0.275858		8.94964e-12	1.36782e-11	11.2481	0.141161	0.0408128	0.00133765		1.02921e-07	1.57299e-07	7037.01	204.1
		total		367				5.95528e-07	4.36316e-12	136490	5.30908				7.74605e-11							5.85148e-07
UV-1	Woods Hole	Crs2-AG-UV-1F-ol-10x	Udachnaya	367		0.69728	4.05705e-09	3.51353e-07	2.4022e-12	146263	4.95436	0.188161		2.87304e-11	4.12035e-11	10.6811	0.0712388	0.0376124	0.00107083		2.29408e-07	3.29005e-07	4464.84	410.7
		Crs2-AG-UV-1F-ol-20x		367		0.69728	2.88945e-09	2.50235e-07	1.77941e-12	140628	5.15288	0.168197		1.42506e-11	2.04374e-11	11.1554	0.0802243	0.0407905	0.00154721		1.58834e-07	2.27791e-07	7586.96	210.1
		total		367				6.01587e-07	4.18162e-12	143865	5.03694				6.16409e-11							5.56796e-07
UV-1	Woods Hole	Crs3-AG-UV-1L-ol-10x	Udachnaya	367		0.5396	1.5506e-09	1.73528e-07	1.3156e-12	131900	5.49385	0.265954		1.16558e-11	2.16008e-11	10.6688	0.096439	0.0365389	0.00135036		9.07598e-08	1.68198e-07	4261.26	90.5
		Crs3-AG-UV-1L-ol-20x		367		0.5396	2.10575e-08	1.00178e-07	7.45212e-13	134429	5.39051	0.155884		4.72852e-12	8.76301e-12						5.16913e-08	9.57957e-08	6374.63	326.4
		total		367				2.73705e-07	2.06081e-12	132814	5.45603				3.03638e-11							2.63994e-07
UV-1	Woods Hole	Crs1-AG-UV-1-ol-40x	Udachnaya	367		1.1583	1.10347e-08	5.75281e-07	4.05914e-12	141725	5.11299	0.156969		7.4611e-11	6.44142e-11	10.7414	0.0805474	0.0373463	0.000820998		6.31535e-07	5.45226e-07	4988.23	124.5
		Crs1-AG-UV-1-ol-40x-rx		367		1.1583	2.75435e-09	1.43595e-07	1.01267e-12	141798	5.11036	0.216567		1.3024e-11	1.12441e-11	11.2541	0.101865	0.0410595	0.00115857		1.50399e-07	1.29844e-07	7973.39	195.7
		total		367				7.18876e-07	5.07181e-12	141739	5.11246				7.56583e-11							6.7507e-07
1149	Woods Hole	Crs1-AG-1149-ol-40x	Maniitsoq	558		0.46198	3.79115e-08	2.57574e-05	5.45321e-12	4.72334e+06	0.153416	0.0130605		5.23911e-11	1.13406e-10	10.9636	0.0739106	0.0417153	0.000809778		7.45967e-07	1.61472e-06	9405.73	535.2
		Crs1-AG-1149-ol-40x		558		0.46198	6.00073e-09	4.07695e-06	6.85161e-13	5.95035e+06	0.121781	0.0301962		6.53031e-12	1.41355e-11	11.3411	0.157555	0.0475744	0.00176342		1.15985e-07	2.51061e-07	9690.95	303.9
		total		558				2.98343e-05	6.13837e-12	4.8603e+06	0.149093				1.27541e-10							1.86578e-06
527	SUERC	527 ol-gmass SUERC	Maniitsoq	558	y	0.065		1.5234e-05	1.03e-12	1.47903e+07	0.0489941	0.001
527	SUERC	527 SUERC	Maniitsoq	558		0.323		5.1945e-06	1.68619e-12	3.08062e+06	0.235225	0.03
527	Woods Hole	Crs1-AG-527-ol-10x	Maniitsoq	558		0.89759	1.28956e-08	4.50939e-06	1.19024e-12	3.78864e+06	0.191266	0.0144777		1.51517e-11	1.68804e-11	10.6993	0.0709289	0.0704989	0.00178799		1.14992e-06	1.28112e-06	23288.9	1091
		Crs1-AG-527-ol-20x		558		0.89759	1.03892e-08	3.63294e-06	1.06416e-12	3.41391e+06	0.21226	0.0185634		1.28007e-11	1.42612e-11	10.875	0.0997649	0.0745209	0.00219964		1.01871e-06	1.13494e-06	24898.7	1398
		total		558				8.14233e-06	2.2544e-12	3.61176e+06	0.200633				3.11417e-11							2.41606e-06
1072	Woods Hole	Crs2-AG-1072-ol-20x	Maniitsoq	558		0.31036	6.08478e-09	6.15365e-06	4.01449e-12	1.53286e+06	0.472736	0.0401244		3.20473e-11	1.03259e-10	10.7384	0.0633895	0.0425429	0.0010313		4.42913e-07	1.42709e-06	4235.92	139.7
		Crs2-AG-1072-ol-20x		558		0.31036	5.32942e-09	1.03694e-06	7.48735e-13	1.38493e+06	0.523232	0.0436517		4.23309e-12	1.36393e-11						8.98784e-08	2.89594e-07	5765.39	162
		total		558				7.1906e-06	4.76323e-12	1.50961e+06	0.480018				1.16898e-10							1.71669e-06
SSARU-1	Woods Hole	Crs3-AG-SSARU-1-ol-68132-10x	Sarfartoq	578		0.68132	9.813e-09	8.69742e-07	1.76723e-12	492149	1.4724	0.0701208		6.47034e-12	9.49677e-12	11.1234	0.194907	0.0416864	0.00207556		9.46789e-08	1.38964e-07	4397.88	107.2
		Crs3-AG-SSARU-1-ol-68132-20x		578		0.68132	8.20439e-09	7.27168e-07	1.47919e-12	491600	1.47404	0.0741972		4.5955e-12	6.74499e-12						7.99184e-08	1.17299e-07	5161.93	139.3
		total		578				1.59691e-06	3.24642e-12	491899	1.47314				1.62418e-11							2.56263e-07
L5C	Woods Hole	Crs2-AG-L5C-ol-10x	Sarfartoq	578		0.7358	5.17216e-09	2.20631e-06	1.83924e-12	1.19958e+06	0.604077	0.0361533		1.20659e-11	1.63983e-11	10.95	0.0941718	0.0478209	0.00142373		2.55693e-07	3.47504e-07	6989.79	476.7
		Crs2-AG-L5C-ol-20x		578		0.7358	5.08866e-09	2.17069e-06	1.55161e-12	1.39899e+06	0.517973	0.0310678		1.03487e-11	1.40645e-11	11.251	0.118789	0.0461779	0.00127745		1.88633e-07	2.56365e-07	6609.64	107
		total		578				4.377e-06	3.39085e-12	1.29083e+06	0.561376				3.04628e-11							6.03869e-07
P1K1	Woods Hole	Crs2-AG-P1K1-ol-10x	Pipe 1	582		0.20815	3.27927e-09	9.51351e-07	1.34031e-12	709800	1.0209	0.0656108		4.81961e-12	2.31545e-11						7.54607e-08	3.6253e-07	6072.14	218.7
		Crs2-AG-P1K1-ol-20x		582		0.20815	3.04805e-09	8.8427e-07	9.54528e-13	926396	0.782212	0.0794181		2.70106e-12	1.29765e-11						5.20067e-08	2.49852e-07	7435.27	1210.8
		total		582				1.83562e-06	2.29484e-12	799892	0.905919				3.6131e-11							6.12383e-07
Ne isotope ratios quantified only when 20Ne > 1E-10 cc
