# Supplementary material for: Primordial neon and the deep mantle origin of kimberlites
Source: Nat Commun. 2025 Apr 6;16:3281. doi: 10.1038/s41467-025-58625-5 (PMC11972409; doi:10.1038/s41467-025-58625-5)
Supplement: Supplementary file 6 — Supplementary Data 3 [file 41467_2025_58625_MOESM6_ESM.xlsx]

## Sheet: Bulk Kimberlite TE
Supplementary Table S3. Trace elements (ppm) and Sr-Nd-Hf isotope compositions of bulk kimberlite rocks and olivine separates
Bulk Rock Sample	Pipe/Locality	Cluster/Field	Country	Reference	Li	Sc	Ti	V	Cr	Co	Ni	Cu	Zn	Ga	Rb	Sr	Y	Zr	Nb	Ba	La	Ce	Pr	Nd	Sm	Eu	Gd	Tb	Dy	Ho	Er	Tm	Yb	Lu	Hf	Ta	Pb	Th	U		Age (Ma)		87Rb/86Sr	87Sr/86Sr	2 SE	87Sr/86Sr_i		147Sm/144Nd	143Nd/144Nd
WESK-8	Wesselton	Kimberley	South Africa	Giuliani et al., 2021	4.3041	11.4702		86.768	1868.52	84.4756	1306.89	65.1604	70.5477	6.43729	96.1648	1138.59	12.4839	259.012	156.297	1461.85	97.6227	197.307	22.8518	83.13	12.2497	3.17098	7.77375	0.84634	3.5892	0.543829	1.08209	0.122742	0.629278	0.0778478	5.75879	11.0831	4.54814	10.9651	2.98077		88		0.244088	0.704909	1.7e-05	0.704606		0.0891356	0.512636
KB14-01	Letseng	North Lesotho	Lesotho	Stamm et al., 2018		13.3		170		57		49	68		68	1801	17.6	198	156	1668	119	205	22	80	11.9	3.1	7.6	0.88	4	0.62	1.41	0.16	0.89	0.128	1.3	7	10.1	14.7	4.1		92		0.109117			0.703656		0.0899789
AK6-S	Karowe	Orapa	Botswana	this study	9.39107	10.5613	11527	76.7428	1291.26	105.35	1335.88	56.5899	82.9286	7.18987	121.489	392.325	10.2362	99.9383	106.175	773.4	50.5353	92.1681	10.1151	36.3997	5.76627	1.52266	4.0194	0.52362	2.25518	0.368843	0.853913	0.119269	0.6559	0.0923982	2.53856	8.17829	3.47487	7.95053	1.78476		94		0.894931	0.705565	1.16499e-05	0.704415		0.0958255	0.512722
Murowa M3	Murowa	Murowa-Sese	Zimbabwe	this study	6.2214	13.3182	3853.54	64.6957	1318.04	77.83	1322.76	39.1403	46.9041	2.7802	51.0031	1222.8	9.06854	91.7261	138.713	1281.55	106.282	195.809	21.2728	73.9562	9.7949	2.51953	6.27494	0.720834	2.39847	0.341566	0.681436	0.0887967	0.486007	0.0644654	2.12005	7.66581	5.00334	15.9232	3.30123		540		0.120542	0.704741	1.38683e-05	0.703829		0.0801141	0.512391
IGWK-2	Igwisi Hills	Igwisi Hills	Tanzania	this study	16.2496	18.8789	11080.4	162.638	859.89	67.9025	465.934	141.538	101.494	9.17727	0.767558	1471.02	20.651	168.034	254.035	3795	172.612	292.333	30.9305	106.681	15.1083	4.50722	10.74	1.28746	4.98307	0.767587	1.60185	0.199646	1.01363	0.140425	4.01786	15.0927	24.5456	23.2036	4.73735		0.01		0.00150796	0.704188	1.06443e-05	0.704188		0.0856666	0.512749
DZA-002 391.85	Koidu	Koidu/Tonguma	Sierra Leone	Fitzpayne et al., 2023	4.95242	13.0788		90.0626	2107.22	116.98	1554.97	36.8654	63.1544	5.58972	105.366	861.179	6.95089	119.151	344.271	1443.39	241.832	471.93	48.9701	152.364	15.6514	3.44401	6.89993	0.698193	2.42402	0.315598	0.577215	0.0606389	0.292999	0.0379467	3.11075	21.3772	6.86667	45.6155	4.72241		145		0.366424	0.704632	2.25628e-05	0.703916		0.0621376	0.512492
TG12-176	Tonguma	Koidu/Tonguma	Sierra Leone	Fitzpayne et al., 2023	6.62409	20.0024		107.019	1319.22	80.1481	1130.56	37.9839	46.1283	9.34308	198.623	1272.05	13.0584	176.42	382.395	2699.22	246.139	477.415	51.5204	168.582	19.9484	4.78781	9.58318	1.01445	3.58341	0.504212	1.00168	0.115904	0.594978	0.0752893	4.76259	18.4157	11.0672	42.5664	6.11384		137		0.4624	0.704563	2.4e-05	0.703691		0.0715781	0.512597
UV-1	Udachnaya-East	Daldyn	Russia	this study	28.8483	10.3796	8919.09	82.5544	956.178	77.6376	1083.39	98.5186	53.3382	4.7402	52.7579	572.864	9.21147	101.311	142.749	953.537	74.844	134.258	14.2296	47.8498	6.51852	1.7411	4.55786	0.550679	2.13282	0.332619	0.711977	0.102909	0.520975	0.0701511	2.68979	9.87773	3.08815	9.18999	1.92297		367		0.266154	0.705812	1.1e-05	0.704446		0.0824048	0.512582
BV1	Leslie	Lac de Gras	Canada	this study	4.62502	12.1269	3117	66.7611	1542.18	95.0463	1525.25	81.2188	46.785	2.40325	24.5558	1210.36	5.33185	45.1164	195.286	2033.13	151.087	256.022	25.0781	73.996	7.19861	1.87854	3.70447	0.405496	1.3545	0.19957	0.414806	0.052987	0.274884	0.03733	0.995131	10.4535	8.04663	19.4022	3.65549		63		0.0586326	0.70447	7.25327e-06	0.704429		0.058847	0.512462
BV14	Leslie	Lac de Gras	Canada	this study	6.26529	7.92355	2986.83	72.1504	1727.4	82.5411	1401.39	50.3442	43.2706	3.05241	99.9609	951.689	3.77858	31.2	143.387	1342.5	99.4986	161.206	16.1048	49.4296	5.08876	1.28839	3.03266	0.348591	0.901062	0.131918	0.290995	0.0394988	0.195661	0.0291534	0.787689	8.21483	6.0158	8.97386	2.28933		53		0.303552	0.705	1.09387e-05	0.704775		0.0622743	0.512499
J-GP	Jericho	Conmtowayto	Canada	this study	11.5653	13.7022	6618.79	90.8265	1939.77	94.8253	1346.39	101.054	62.0483	3.53321	54.5448	1522.49	7.44364	78.2475	173.609	2103.35	129.445	206.508	20.3228	62.9123	7.66084	2.11143	5.08102	0.575186	1.87317	0.279416	0.54638	0.0723483	0.357258	0.0537319	1.97044	9.04548	12.2356	19.1676	3.16747		173		0.103537	0.70729	1.03093e-05	0.70704		0.0736588	0.512597
MPV 04-193C 99.85m	Pipe 5034	Ghacho Kue	Canada	Giuliani et al., 2021	12.6577	8.5883		68.6964	1135.44	122.191	2182.37	64.7735	57.4422	3.24653	82.5565	356.069	6.12522	61.8767	94.9088	1293.88	72.8004	121.183	12.3984	40.6731	5.39743	1.35721	3.00782	0.340213	1.45413	0.221073	0.472144	0.0608745	0.316265	0.0412596	1.47717	4.89488	9.0798	9.80589	2.07914		542		0.670061					0.0802719	0.512204
Victor	Victor	Attawapiskat	Canada	this study	8.58644	10.3648	5127.14	99.19	1604.18	83.0087	1242.07	175.066	50.39	3.53234	25.6014	462.727	5.11559	37.2606	62.7284	1080.82	47.7152	78.6748	8.34205	29.1797	3.95783	1.09801	2.7744	0.337355	1.2724	0.190898	0.387715	0.0478152	0.281052	0.0375152	0.99159	4.1173	5.69403	7.39355	1.19138		177		0.159896	0.704857	1.11174e-05	0.704522		0.0820465	0.51273
1149		Maniitsoq	Greenland	this study	3.2037	10.3212	15869.4	163.664	1130.87	85.9116	880.719	126.717	53.8611	4.61406	13.0888	722.803	5.94767	128.117	131.443	656.828	90.3869	163.02	17.8534	58.8065	7.39368	1.76342	4.76907	0.53355	1.67265	0.241038	0.437029	0.0557328	0.289269	0.0376008	3.1678	10.4617	5.69092	6.23377	1.84308		558		0.0523333	0.703871	5.75016e-06	0.703461		0.0760534	0.512338
527		Maniitsoq	Greenland	this study	16.831	12.214	8847.83	133.542	1983.63	89.1697	1167.94	68.3755	58.7852	3.92888	51.255	1057.29	11.0397	125.667	170.333	1690.71	152.067	276.058	29.3725	96.9318	12.0434	3.11695	7.99116	0.914355	2.99835	0.457417	0.90583	0.106571	0.577549	0.0724719	3.12629	10.2642	7.88776	9.3753	2.5433		558		0.140101	0.704124	6.1533e-06	0.703025		0.0751567	0.512332
SSARU-1		Sarfartoq	Greenland	this study	10.9798	14.8613	19692.5	195.605	1074.87	93.1673	706.63	103.754	84.0173	6.64741	69.9348	1118.72	13.4957	210.476	175.885	995.799	105.399	201.649	22.7718	79.5617	11.0183	2.86156	7.36779	0.890776	3.2735	0.504086	1.02734	0.129947	0.671894	0.0875024	5.22327	12.7207	4.54195	11.9979	3.35364		578		0.180662	0.704323	9.35541e-06	0.702856		0.0837709	0.512359
L5c		Sarfartoq	Greenland	this study	21.1511	6.48074	7721.26	66.2203	1643.82	89.2348	1208.73	59.3078	53.015	2.7986	27.0599	494.089	4.17224	42.5772	83.2682	320.693	61.4542	127.668	14.5248	50.0573	6.16308	1.39215	3.80296	0.424568	1.26076	0.17023	0.357482	0.040563	0.222889	0.0299506	1.44582	7.18945	2.19804	5.22493	1.54392		578		0.158277	0.704221	8.73142e-06	0.702935		0.0744756	0.512262
Olivine sample
WESK-8 Oli	Wesselton W3	Kimberley	South Africa	this study	2.16669	1.42009	188.811	6.90105	286.516	145.529	2971.1	3.97848	52.9339	0.250375	0.354816	3.18717	0.063985	2.1366	1.1165	4.20244	0.40288	0.795916	0.0923413	0.339564	0.0529049	0.0150329	0.0366121	0.00481401	0.0160658	0.00260564	0.0048305	0.000668078	0.0045253	0.000587502	0.0442994	0.0833591	0.0812649	0.0396102	0.0102867		88		0.321733	0.70474	3.038e-06	0.70434		0.094245	0.512625
KB14 Oli	Letseng	North Lesotho	Lesotho	this study	2.51971	1.93201	205.847	7.87868	153.539	148.062	1948.07	4.22591	95.7994	0.249668	0.278816	6.15318	0.0765562	2.63235	0.887304	5.26039	0.378152	0.712603	0.0801827	0.279075	0.0427291	0.0134109	0.0329923	0.00434662	0.0139884	0.00260545	0.0060966	0.00104709	0.00616931	0.00108131	0.0902158	0.381983	0.157526	0.0432584	0.011739		92		0.130953	0.703741	3.437e-06	0.703584		0.0926162	0.512691
AK6S Oli	Karowe	Orapa	Botswana	this study	3.19089	1.97549	283.858	14.9216	277.188	142.769	2282.03	7.31442	69.848	0.833962	3.3509	12.5162	0.121944	2.53838	1.50698	12.814	0.549489	0.973837	0.107458	0.384002	0.0631645	0.0206814	0.0471849	0.00620751	0.0270684	0.00379418	0.0100431	0.00150588	0.00916494	0.00159118	0.0545386	0.791552	0.24101	0.0609988	0.0157168		94		0.773724	0.70557	3.0366e-06	0.704576		0.0995001	0.512729
Murowa M3 Oli	Murowa	Murowa-Sese	Zimbabwe	this study	1.19151	1.42172	74.9639	5.56982	366.646	114.359	2525.45	3.80847	51.9315	0.0785833	0.0265402	1.31436	0.0200978	0.223877	0.709908	0.74845	0.228724	0.422757	0.0440524	0.141505	0.0169571	0.00508166	0.0115533	0.00150316	0.00528517	0.000894391	0.00223047	0.000254983	0.00137001	0.00027964	0.00604556	0.889278	0.0375164	0.0115737	0.00545538		540
IGWK-2 Oli	Igwisi Hills	Igwisi Hills	Tanzania	this study	2.6764	3.10388	281.623	4.93563	664.577	130.778	2523.05	5.40225	51.0047	0.321551	0.499069	6.84713	0.0888148	1.69682	4.00316	44.7079	1.48299	3.11896	0.332813	1.1525	0.143246	0.0459632	0.0928015	0.0106209	0.0271441	0.00371849	0.0092868	0.00118907	0.00949424	0.00147744	0.0419458	0.218297	0.185034	0.320114	0.0411719		0.01		0.210645	0.704183	3.2008e-06	0.704183		0.0751838	0.512759
DZA-002 Oli	Koidu	Koidu/Tonguma	Sierra Leone	this study	2.04301	1.37468	170.92	6.00474	192.53	141.03	2566.75	5.23997	60.7464	0.108483	0.0689755	1.98381	0.0365419	0.512222	1.01099	2.97562	0.476564	0.976051	0.109205	0.342314	0.0408298	0.0126811	0.0278584	0.00344724	0.00929156	0.00160704	0.00355754	0.000515262	0.00240393	0.000479305	0.014895	0.0655053	0.083884	0.1298	0.0113622		145		0.100483	0.704197	3.6123e-06	0.703993		0.07215	0.512482
TG12-176 Oli	Tonguma	Koidu/Tonguma	Sierra Leone	this study	1.33815	0.98974	133.694	4.59828	232.698	114.223	2509.2	2.34486	36.7985	0.0437157	0.0913578	1.95276	0.0465051	0.6767	1.50157	2.50673	0.22138	0.382953	0.0409918	0.131804	0.0181179	0.00575747	0.0145344	0.00201348	0.00771078	0.00125521	0.00284197	0.000480445	0.00325403	0.00064389	0.0169884	0.615445	0.150309	0.0197916	0.00767669		137
UV1 dark Oli	Udachnaya-East	Daldyn	Russia	this study	2.30024	1.40615	156.778	5.36985	198.719	122.786	2287.37	6.8684	66.2083	0.125909	0.275584	2.27751	0.04209	0.768811	1.01274	2.89048	0.202477	0.364185	0.0382438	0.129724	0.0172358	0.00596831	0.0149869	0.00200448	0.00683574	0.0013166	0.00340852	0.00047723	0.00411887	0.000561109	0.0187029	0.0548904	0.0856109	0.0180711	0.00537408		367
UV1 light Oli	Udachnaya-East	Daldyn	Russia	this study	1.46204	0.967929	43.6985	4.54664	204.027	113.396	2515.6	8.8323	36.428	0.0474794	0.117468	1.29227	0.0134429	0.199498	0.435965	1.25864	0.0676779	0.118298	0.0112141	0.035232	0.00553018	0.001711	0.00461802	0.00052164	0.00253933	0.000370461	0.00110537	0.00026798	0.00163463	0.000436016	0.00467248	0.0524184	0.0474698	0.00491785	0.00192582		367
UV1 fine-grained Oli	Udachnaya-East	Daldyn	Russia	this study	2.16231	1.40213	132.615	5.4588	215.565	127.535	2614.77	5.34486	69.7826	0.102363	0.273943	3.04281	0.0443343	0.813063	1.06726	4.52533	0.290625	0.518559	0.0544718	0.181458	0.0272173	0.00828957	0.0182868	0.00285179	0.00858278	0.00178323	0.00409217	0.000531447	0.0034972	0.000783835	0.021697	0.0577216	0.0746196	0.0254341	0.00723783		367		0.260186	0.70748	3.1909e-06	0.706145		0.0907304	0.512589
BV1 Oli	Leslie	Lac de Gras	Canada	this study	1.80386	2.35889	362.377	9.39616	332.324	124.949	2410.3	10.2531	56.1829	0.314143	1.43135	77.8071	0.492115	3.27246	12.517	101.389	11.6139	18.5574	1.7415	5.30915	0.534559	0.146897	0.381206	0.0452085	0.11124	0.0159998	0.0338577	0.00417844	0.0251861	0.00342581	0.065509	0.631643	0.692095	0.840144	0.170881		63
BV1 Oli (2)	Leslie	Lac de Gras	Canada	this study	1.73061	1.92687	305.291	9.781	313.469	133.731	2557.21	10.5511	51.9578	0.301774	1.7739	74.9959	0.498007	3.03165	12.6995	101.187	11.6702	18.9568	1.82133	5.48515	0.552694	0.139084	0.288038	0.033534	0.102821	0.015324	0.031207	0.004218	0.009757	0.000743	0.042203	0.672191	0.627658	1.13247	0.223958		63		0.0683579	0.704637	6.3132e-06	0.704637		0.0609508	0.512475
BV14 Oli	Leslie	Lac de Gras	Canada	this study	1.4823	1.1026	116.858	5.95972	268.16	124.1	2508.68	6.57849	62.5974	0.119647	0.220086	1.48074	0.0176099	4.6434	1.72385	9.58	0.185816	0.33366	0.0336204	0.105322	0.0129827	0.00630558	0.00892163	0.00113221	0.00362082	0.000527797	0.00139549	0.000104761	0.00157212	0.000203913	0.0975019	2.04573	0.054086	0.0267502	0.00960146		53
J-GP coarse Oli	Jericho	Conmtowayto	Canada	this study	1.69683	1.35371	131.358	7.00592	306.207	129.722	2548.5	5.61605	47.1454	0.108033	0.249987	2.31613	0.0541275	0.274766	1.14813	3.21709	0.300036	0.404041	0.0373549	0.121623	0.0173739	0.00790984	0.0152061	0.00215907	0.00720648	0.00128966	0.00303997	0.000363388	0.00167985	0.000290521	0.00749054	0.105936	0.118697	0.0224695	0.00637892		173		0.311926	0.705985	2.8461e-06	0.705231		0.0864103	0.512594
J-GP fine-grained Oli	Jericho	Conmtowayto	Canada	this study	1.74175	1.4927	127.632	7.03297	322.372	126.093	2448.5	4.94992	45.6521	0.0970861	0.230221	2.13936	0.059668	0.59137	1.07987	3.39772	0.317249	0.424369	0.0379333	0.123826	0.01822	0.00804994	0.0170246	0.00237921	0.00928912	0.00143586	0.00321379	0.000368223	0.00246445	0.000320155	0.0152443	1.80493	0.130749	0.0216993	0.00646224		173		0.310999	0.706157	3.2071e-06	0.705406		0.0890061	0.512613
MPV 04-193C Oli	Pipe 5034	Ghacho Kue	Canada	this study	1.81046	0.917822	124.566	7.71095	226.149	128.587	2795.5	4.87445	44.0849	0.315558	0.873192	18.1922	0.0540519	2.05812	1.69991	13.1061	0.56112	0.88629	0.0868306	0.286542	0.0408546	0.0141406	0.0287757	0.00382017	0.0123057	0.00214056	0.00419411	0.000326971	0.00312534	0.000432256	0.0377736	0.0794842	0.299915	0.0537487	0.0274753		542
Victor Oli	Victor	Attawapiskat	Canada	this study	2.10718	1.39881	105.554	4.60731	125.02	124.726	2231.19	4.9401	52.0023	0.063463	0.0563697	2.81855	0.0178545	0.205014	0.90257	7.3651	0.0869698	0.140426	0.0156032	0.054816	0.00834868	0.00402734	0.00567751	0.00098075	0.00310833	0.000475359	0.00179435	0.000347606	0.00208701	0.000378326	0.00524579	0.0414472	0.061074	0.00803627	0.00178403		177		0.0577987	0.707982	3.0488e-06	0.707861		0.0921284	0.512776
P1K1 Oli	Pipe 1, Koskeniemi	Kaavi-Kuopio	Finland	this study	1.78161	1.76988	175.564	8.48401	411.264	131.59	2512.8	22.0895	51.7215	0.220589	0.337805	4.11882	0.0390912	0.214424	0.506878	6.73628	0.191511	0.318346	0.0298197	0.0959139	0.0162717	0.00529531	0.00934368	0.00107676	0.00587633	0.00137057	0.00313786	0.000515958	0.00377283	0.000681171	0.00567385	0.0278952	0.158038	0.020863	0.00822987		582
1149 Oli		Maniitsoq	Greenland	this study	1.85773	2.61865	481.979	11.368	358.185	139.464	2460.02	8.54868	56.775	0.3426	0.79557	3.53503	0.109595	3.54709	6.45384	31.3112	1.12709	2.20703	0.232521	0.793475	0.133842	0.034046	0.060971	0.004341	0.023637	0.00429	0.009178	0.002075	0.012378	0.002332	0.085531	0.256029	0.20048	0.214819	0.03695		558		0.650404	0.708168	6.8448e-06	0.702975		0.102033	0.512376
527 Oli		Maniitsoq	Greenland	this study	2.20547	1.68186	231.672	7.87246	246.962	125.241	2526.53	4.21282	49.7895	0.141553	0.520716	6.51306	0.0612639	1.5631	1.35126	23.8065	0.675666	1.14767	0.111161	0.36995	0.0458272	0.0232093	0.0340549	0.00461039	0.0154837	0.00216633	0.00524543	0.000709616	0.00466896	0.000697478	0.0380143	0.0912818	0.233968	0.0859709	0.035464		558		0.231054	0.705071	3.1746e-06	0.703259		0.0749315	0.512323
527 Oli (2)		Maniitsoq	Greenland	this study	3.06024	2.01797	310.403	12.3525	383.566	195.894	3802.36	6.8017	86.3772	0.253891	0.950007	3.86368	0.078998	2.25617	1.28547	13.0134	0.606579	1.02399	0.105578	0.347938	0.044195	0.014705	0.029822	0.003901	0.020439	0.003168	0.007258	0.001191	0.007434	0.001168	0.055998	0.114438	0.721284	0.154869	0.081301		558							0.0768343	0.512354
1072 Oli		Maniitsoq	Greenland	this study	1.99084	3.34363	617.117	9.92968	333.72	127.013	2341.75	8.23507	48.9463	0.25502	0.543145	32.7529	0.22441	3.90201	7.80579	34.3625	1.8466	3.46434	0.372458	1.27737	0.175894	0.057795	0.122913	0.0160052	0.0513338	0.00829933	0.0170391	0.00204793	0.0142799	0.00225231	0.0978098	0.472502	0.212103	0.254266	0.0358938		578
SSARU Oli		Sarfartoq	Greenland	this study	2.5493	2.3301	219.495	7.39626	83.054	157.097	1202.89	7.98953	91.1753	0.211469	0.196751	2.74706	0.0521931	0.92358	0.474812	1.73399	0.238825	0.458853	0.0484725	0.17506	0.0266695	0.00796632	0.0203053	0.00285156	0.013253	0.00223106	0.00530152	0.000887187	0.00493211	0.000990216	0.0250792	0.0448893	0.0531397	0.0251571	0.00734627		578
L5c Oli		Sarfartoq	Greenland	this study	2.04663	1.65578	158.581	8.20611	295.871	130.174	2703.35	3.81474	46.3198	0.125442	0.21502	4.42675	0.0375258	5.7037	0.928187	2.62813	0.397013	0.746033	0.0813504	0.275445	0.0376145	0.0103346	0.0255381	0.00282306	0.00969539	0.0013392	0.00306197	0.000440319	0.00233205	0.000463252	0.0858741	0.0568109	0.0402244	0.03921	0.0206203		578
0.000 = below the limit of detection
Rock standards
BCR-2 (trace element analysis)					9.26236	29.5827	12447.7	384.335	14.3175	35.6899	11.0293	16.8078	125.194	20.3513	43.1972	310.94	35.1391	171.795	10.9474	643.932	24.1498	51.4346	6.55675	27.5454	6.31394	1.84808	6.16277	0.952252	5.98266	1.2159	3.31709	0.529779	3.04473	0.449065	4.43863	0.813737	9.33542	5.60027	1.51244
BCR-2 (trace element analysis)					9.11872	30.7174	13009.1	403.657	14.7009	36.8324	11.2718	17.0417	141.293	22.7174	51.8964	347.833	39.3146	188.986	11.9892	699.251	26.1108	54.8632	7.15624	30.1249	6.86612	2.04387	6.64352	1.02757	6.56916	1.3714	3.7224	0.581924	3.34744	0.492428	4.97401	1.05787	10.6685	6.04607	1.70323
BHVO-2 (trace element analysis)					6.88909	33.4439	18036.1	349.989	313.292	49.7157	135.961	146.245	112.36	20.3276	9.2062	383.53	26.8391	163.746	16.8434	126.747	15.0911	37.41	5.3027	24.6045	6.09294	1.99827	5.90721	0.891803	5.28986	0.992812	2.40456	0.354596	1.92658	0.265333	4.29608	1.15264	1.41278	1.20365	0.408945
BHVO-2 (trace element analysis)					7.97104	34.4414	18631.5	362.701	327.341	52.7329	140.416	151.404	115.872	21.4936	11.1293	392.851	26.933	167.505	17.1126	130.304	15.5026	38.1344	5.42844	25.0248	6.17809	2.03736	5.91468	0.901592	5.09989	0.976699	2.39702	0.344681	1.88481	0.259701	4.25325	1.14644	2.17545	1.20406	0.404635
BCR-2 (Nd-Hf isotopes)																																																	0.512642
BCR-2 (Nd-Hf isotopes)																																																	0.512628
BCR-2 (Nd-Hf isotopes)																																																	0.512632
BHVO-2 (Nd-Hf isotopes)																																																	0.512986
BHVO-2 (Nd-Hf isotopes)																																																	0.51297
BHVO-2 (Nd-Hf isotopes)																																																	0.512984
BHVO-2 (Nd-Hf isotopes)																																																	0.512968
BHVO-2 (Nd-Hf isotopes)																																																	0.512964
BHVO-2 (Nd-Hf isotopes)																																																	0.51298
BHVO-2 (TIMS Sr isotope analysis)																																												0.703469	7.78768e-06
BCR-2 (MC-ICP-MS Sr isotope analysis)																																												0.7068	1.31961e-05
BIR (MC-ICP-MS Sr isotope analysis)																																												0.703097	1.06319e-05
[truncated: 9 more columns]
