# Supplementary material for: Primordial neon and the deep mantle origin of kimberlites
Source: Nat Commun. 2025 Apr 6;16:3281. doi: 10.1038/s41467-025-58625-5 (PMC11972409; doi:10.1038/s41467-025-58625-5)
Supplement: Supplementary file 7 — Supplementary Data 4 [file 41467_2025_58625_MOESM7_ESM.xlsx]

## Sheet: Sheet1
Supplementary Table S4. Endmember components utilised in He-Ne isotope mixing models
endmember component	comment	He (cm3/g)	4He/3He	Ne (cm3/g)	21Ne/22Ne	references for He-Ne isotopes
continental crust	contaminant	0.001	7.46269e+07	8.74126e-10	0.52	Ballentine and Burnard, 2002
SCLM	off craton	1e-05	115000	1e-10	0.071	Gautheron et al., 2005
enriched SCLM	model - 0.5 Gyr	1.76e-05	213243	1e-10	0.105803
enriched SCLM	model - 1 Gyr	2.6e-05	315622	1e-10	0.144334
enriched SCLM	model - 2 Gyr	4.6e-05	560713	1e-10	0.236577
subducted oceanic crust	1 Gyr old	3.89892e-06	4.82961e+06	1e-11	0.206224
subducted oceanic crust	2 Gyr old	8.8032e-06	1.07527e+07	1e-11	0.429146
DMM - upper mantle	kimberlite source	5e-07	90000	5e-12	0.06	Graham, 2002; Moreira et al., 1998
DMM - upper mantle	kimberlite melt	0.0001	90000	3e-09	0.06	Graham, 2002; Moreira et al., 1998
DMM - upper mantle	kimberlite fluid	5e-05	90000	3e-09	0.06	Graham, 2002; Moreira et al., 1998
Baffin plume	kimberlite source	1e-06	11138.3	1e-11	0.035	Horton et al., 2021, 2023
Baffin plume	kimberlite melt	0.0001	11138.3	3e-09	0.035	Horton et al., 2021, 2023
Baffin plume	kimberlite fluid	5e-05	11138.3	3e-09	0.035	Horton et al., 2021, 2023
SCLM = subcontinental lithospheric mantle
see Methods for details of how endmember compositions were obtained
		He cc	4He/3He	Ne cc	21Ne/22Ne
crust	He based on U-Th and 2Ga	0.001	7.46269e+07	8.74126e-10	0.52
SCLM	Koidu (high Ar)	1	367610	0.25	0.065
SCLM	Kimberley	1	249860	0.25	0.0832039
SCLM	Letseng	1	155269	0.25	0.0951565
SCLM	off craton	1e-05	115000	1e-10	0.071
enriched SCLM	model - 0.5 Gyr	1.76e-05	213243	1e-10	0.105803
enriched SCLM	model - 1 Gyr	2.6e-05	315622	1e-10	0.144334
enriched SCLM	model - 2 Gyr	4.6e-05	560713	1e-10	0.236577
subducted crust	1 Gyr old	3.89892e-06	4.82961e+06	1e-11	0.206224
subducted crust	2 Gyr old	8.8032e-06	1.07527e+07	1e-11	0.429146
DMM	upper mantle	5e-07	90000	5e-12	0.06
kimberlite melt	DMM	0.0001	90000	3e-09	0.06
plume source	Baffin	1e-06	11138.3	1e-11	0.035
plume melt	Baffin	0.0001	11138.3	3e-09	0.035
		He cc	4He/3He	Ne cc	21Ne/22Ne
crust	He based on U-Th and 2Ga	0.001	7.46269e+07	8.74126e-10	0.52
SCLM	Koidu (high Ar)	1	367610	0.25	0.065
SCLM	Kimberley	1	249860	0.25	0.0832039
SCLM	Letseng	1	155269	0.25	0.0951565
SCLM	off craton	1e-05	115000	1e-10	0.071
enriched SCLM	model - 0.5 Gyr	1.76e-05	213243	1e-10	0.105803
enriched SCLM	model - 1 Gyr	2.6e-05	315622	1e-10	0.144334
enriched SCLM	model - 2 Gyr	4.6e-05	560713	1e-10	0.236577
subducted crust	1 Gyr old	3.89892e-06	4.82961e+06	1e-11	0.206224
subducted crust	2 Gyr old	8.8032e-06	1.07527e+07	1e-11	0.429146
DMM	upper mantle	5e-07	90000	5e-12	0.06
kimberlite melt	DMM	0.0001	90000	3e-09	0.06
plume source	Baffin	1e-06	11138.3	1e-11	0.035
plume melt	Baffin	0.0001	11138.3	3e-09	0.035
		He cc	4He/3He	Ne cc	21Ne/22Ne
crust	He based on U-Th and 2Ga	0.001	7.46269e+07	8.74126e-10	0.52
SCLM	Koidu (high Ar)	1	367610	0.25	0.065
SCLM	Kimberley	1	249860	0.25	0.0832039
SCLM	Letseng	1	155269	0.25	0.0951565
SCLM	off craton	1e-05	115000	1e-10	0.071
enriched SCLM	model - 0.5 Gyr	1.76e-05	213243	1e-10	0.105803
enriched SCLM	model - 1 Gyr	2.6e-05	315622	1e-10	0.144334
enriched SCLM	model - 2 Gyr	4.6e-05	560713	1e-10	0.236577
subducted crust	1 Gyr old	3.89892e-06	4.82961e+06	1e-11	0.206224
subducted crust	2 Gyr old	8.8032e-06	1.07527e+07	1e-11	0.429146
DMM	upper mantle	5e-07	90000	5e-12	0.06
kimberlite melt	DMM	0.0001	90000	3e-09	0.06
plume source	Baffin	1e-06	11138.3	1e-11	0.035
plume melt	Baffin	0.0001	11138.3	3e-09	0.035
		He cc	4He/3He	Ne cc	21Ne/22Ne
crust	He based on U-Th and 2Ga	0.001	7.46269e+07	8.74126e-10	0.52
SCLM	Koidu (high Ar)	1	367610	0.25	0.065
SCLM	Kimberley	1	249860	0.25	0.0832039
SCLM	Letseng	1	155269	0.25	0.0951565
SCLM	off craton	1e-05	115000	1e-10	0.071
enriched SCLM	model - 0.5 Gyr	1.76e-05	213243	1e-10	0.105803
enriched SCLM	model - 1 Gyr	2.6e-05	315622	1e-10	0.144334
enriched SCLM	model - 2 Gyr	4.6e-05	560713	1e-10	0.236577
subducted crust	1 Gyr old	3.89892e-06	4.82961e+06	1e-11	0.206224
subducted crust	2 Gyr old	8.8032e-06	1.07527e+07	1e-11	0.429146
DMM	upper mantle	5e-07	90000	5e-12	0.06
kimberlite melt	DMM	0.0001	90000	3e-09	0.06
plume source	Baffin	1e-06	11138.3	1e-11	0.035
plume melt	Baffin	0.0001	11138.3	3e-09	0.035
		He cc	4He/3He	Ne cc	21Ne/22Ne
crust	He based on U-Th and 2Ga	0.001	7.46269e+07	8.74126e-10	0.52
SCLM	Koidu (high Ar)	1	367610	0.25	0.065
SCLM	Kimberley	1	249860	0.25	0.0832039
SCLM	Letseng	1	155269	0.25	0.0951565
SCLM	off craton	1e-05	115000	1e-10	0.071
enriched SCLM	model - 0.5 Gyr	1.76e-05	213243	1e-10	0.105803
enriched SCLM	model - 1 Gyr	2.6e-05	315622	1e-10	0.144334
enriched SCLM	model - 2 Gyr	4.6e-05	560713	1e-10	0.236577
subducted crust	1 Gyr old	3.89892e-06	4.82961e+06	1e-11	0.206224
subducted crust	2 Gyr old	8.8032e-06	1.07527e+07	1e-11	0.429146
DMM	upper mantle	5e-07	90000	5e-12	0.06
kimberlite melt	DMM	0.0001	90000	3e-09	0.06
plume source	Baffin	1e-06	11138.3	1e-11	0.035
plume melt	Baffin	0.0001	11138.3	3e-09	0.035
		He cc	4He/3He	Ne cc	21Ne/22Ne
crust	He based on U-Th and 2Ga	0.001	7.46269e+07	8.74126e-10	0.52
SCLM	Koidu (high Ar)	1	367610	0.25	0.065
SCLM	Kimberley	1	249860	0.25	0.0832039
SCLM	Letseng	1	155269	0.25	0.0951565
SCLM	off craton	1e-05	115000	1e-10	0.071
enriched SCLM	model - 0.5 Gyr	1.76e-05	213243	1e-10	0.105803
enriched SCLM	model - 1 Gyr	2.6e-05	315622	1e-10	0.144334
enriched SCLM	model - 2 Gyr	4.6e-05	560713	1e-10	0.236577
subducted crust	1 Gyr old	3.89892e-06	4.82961e+06	1e-11	0.206224
subducted crust	2 Gyr old	8.8032e-06	1.07527e+07	1e-11	0.429146
DMM	upper mantle	5e-07	90000	5e-12	0.06
kimberlite melt	DMM	0.0001	90000	3e-09	0.06
plume source	Baffin	1e-06	11138.3	1e-11	0.035
plume melt	Baffin	0.0001	11138.3	3e-09	0.035
		He cc	4He/3He	Ne cc	21Ne/22Ne
crust	He based on U-Th and 2Ga	0.001	7.46269e+07	8.74126e-10	0.52
SCLM	Koidu (high Ar)	1	367610	0.25	0.065
SCLM	Kimberley	1	249860	0.25	0.0832039
SCLM	Letseng	1	155269	0.25	0.0951565
SCLM	off craton	1e-05	115000	1e-10	0.071
enriched SCLM	model - 0.5 Gyr	1.76e-05	213243	1e-10	0.105803
enriched SCLM	model - 1 Gyr	2.6e-05	315622	1e-10	0.144334
enriched SCLM	model - 2 Gyr	4.6e-05	560713	1e-10	0.236577
subducted crust	1 Gyr old	3.89892e-06	4.82961e+06	1e-11	0.206224
subducted crust	2 Gyr old	8.8032e-06	1.07527e+07	1e-11	0.429146
DMM	upper mantle	5e-07	90000	5e-12	0.06
kimberlite melt	DMM	0.0001	90000	3e-09	0.06
plume source	Baffin	1e-06	11138.3	1e-11	0.035
plume melt	Baffin	0.0001	11138.3	3e-09	0.035
		He cc	4He/3He	Ne cc	21Ne/22Ne
crust	He based on U-Th and 2Ga	0.001	7.46269e+07	8.74126e-10	0.52
SCLM	Koidu (high Ar)	1	367610	0.25	0.065
SCLM	Kimberley	1	249860	0.25	0.0832039
SCLM	Letseng	1	155269	0.25	0.0951565
SCLM	off craton	1e-05	115000	1e-10	0.071
enriched SCLM	model - 0.5 Gyr	1.76e-05	213243	1e-10	0.105803
enriched SCLM	model - 1 Gyr	2.6e-05	315622	1e-10	0.144334
enriched SCLM	model - 2 Gyr	4.6e-05	560713	1e-10	0.236577
subducted crust	1 Gyr old	3.89892e-06	4.82961e+06	1e-11	0.206224
subducted crust	2 Gyr old	8.8032e-06	1.07527e+07	1e-11	0.429146
DMM	upper mantle	5e-07	90000	5e-12	0.06
kimberlite melt	DMM	0.0001	90000	3e-09	0.06
plume source	Baffin	1e-06	11138.3	1e-11	0.035
plume melt	Baffin	0.0001	11138.3	3e-09	0.035
		He cc	4He/3He	Ne cc	21Ne/22Ne
crust	He based on U-Th and 2Ga	0.001	7.46269e+07	8.74126e-10	0.52
SCLM	Koidu (high Ar)	1	367610	0.25	0.065
SCLM	Kimberley	1	249860	0.25	0.0832039
SCLM	Letseng	1	155269	0.25	0.0951565
SCLM	off craton	1e-05	115000	1e-10	0.071
enriched SCLM	model - 0.5 Gyr	1.76e-05	213243	1e-10	0.105803
enriched SCLM	model - 1 Gyr	2.6e-05	315622	1e-10	0.144334
enriched SCLM	model - 2 Gyr	4.6e-05	560713	1e-10	0.236577
subducted crust	1 Gyr old	3.89892e-06	4.82961e+06	1e-11	0.206224
subducted crust	2 Gyr old	8.8032e-06	1.07527e+07	1e-11	0.429146
DMM	upper mantle	5e-07	90000	5e-12	0.06
kimberlite melt	DMM	0.0001	90000	3e-09	0.06
plume source	Baffin	1e-06	11138.3	1e-11	0.035
plume melt	Baffin	0.0001	11138.3	3e-09	0.035
		He cc	4He/3He	Ne cc	21Ne/22Ne
crust	He based on U-Th and 2Ga	0.001	7.46269e+07	8.74126e-10	0.52
SCLM	Koidu (high Ar)	1	367610	0.25	0.065
SCLM	Kimberley	1	249860	0.25	0.0832039
SCLM	Letseng	1	155269	0.25	0.0951565
SCLM	off craton	1e-05	115000	1e-10	0.071
enriched SCLM	model - 0.5 Gyr	1.76e-05	213243	1e-10	0.105803
enriched SCLM	model - 1 Gyr	2.6e-05	315622	1e-10	0.144334
enriched SCLM	model - 2 Gyr	4.6e-05	560713	1e-10	0.236577
subducted crust	1 Gyr old	3.89892e-06	4.82961e+06	1e-11	0.206224
subducted crust	2 Gyr old	8.8032e-06	1.07527e+07	1e-11	0.429146
DMM	upper mantle	5e-07	90000	5e-12	0.06
kimberlite melt	DMM	0.0001	90000	3e-09	0.06
plume source	Baffin	1e-06	11138.3	1e-11	0.035
plume melt	Baffin	0.0001	11138.3	3e-09	0.035
		He cc	4He/3He	Ne cc	21Ne/22Ne
crust	He based on U-Th and 2Ga	0.001	7.46269e+07	8.74126e-10	0.52
SCLM	Koidu (high Ar)	1	367610	0.25	0.065
SCLM	Kimberley	1	249860	0.25	0.0832039
SCLM	Letseng	1	155269	0.25	0.0951565
SCLM	off craton	1e-05	115000	1e-10	0.071
enriched SCLM	model - 0.5 Gyr	1.76e-05	213243	1e-10	0.105803
enriched SCLM	model - 1 Gyr	2.6e-05	315622	1e-10	0.144334
enriched SCLM	model - 2 Gyr	4.6e-05	560713	1e-10	0.236577
subducted crust	1 Gyr old	3.89892e-06	4.82961e+06	1e-11	0.206224
subducted crust	2 Gyr old	8.8032e-06	1.07527e+07	1e-11	0.429146
DMM	upper mantle	5e-07	90000	5e-12	0.06
kimberlite melt	DMM	0.0001	90000	3e-09	0.06
plume source	Baffin	1e-06	11138.3	1e-11	0.035
plume melt	Baffin	0.0001	11138.3	3e-09	0.035
		He cc	4He/3He	Ne cc	21Ne/22Ne
crust	He based on U-Th and 2Ga	0.001	7.46269e+07	8.74126e-10	0.52
SCLM	Koidu (high Ar)	1	367610	0.25	0.065
SCLM	Kimberley	1	249860	0.25	0.0832039
SCLM	Letseng	1	155269	0.25	0.0951565
SCLM	off craton	1e-05	115000	1e-10	0.071
enriched SCLM	model - 0.5 Gyr	1.76e-05	213243	1e-10	0.105803
enriched SCLM	model - 1 Gyr	2.6e-05	315622	1e-10	0.144334
enriched SCLM	model - 2 Gyr	4.6e-05	560713	1e-10	0.236577
subducted crust	1 Gyr old	3.89892e-06	4.82961e+06	1e-11	0.206224
subducted crust	2 Gyr old	8.8032e-06	1.07527e+07	1e-11	0.429146
DMM	upper mantle	5e-07	90000	5e-12	0.06
kimberlite melt	DMM	0.0001	90000	3e-09	0.06
plume source	Baffin	1e-06	11138.3	1e-11	0.035
plume melt	Baffin	0.0001	11138.3	3e-09	0.035
		He cc	4He/3He	Ne cc	21Ne/22Ne
crust	He based on U-Th and 2Ga	0.001	7.46269e+07	8.74126e-10	0.52
SCLM	Koidu (high Ar)	1	367610	0.25	0.065
SCLM	Kimberley	1	249860	0.25	0.0832039
SCLM	Letseng	1	155269	0.25	0.0951565
SCLM	off craton	1e-05	115000	1e-10	0.071
enriched SCLM	model - 0.5 Gyr	1.76e-05	213243	1e-10	0.105803
enriched SCLM	model - 1 Gyr	2.6e-05	315622	1e-10	0.144334
enriched SCLM	model - 2 Gyr	4.6e-05	560713	1e-10	0.236577
subducted crust	1 Gyr old	3.89892e-06	4.82961e+06	1e-11	0.206224
subducted crust	2 Gyr old	8.8032e-06	1.07527e+07	1e-11	0.429146
DMM	upper mantle	5e-07	90000	5e-12	0.06
kimberlite melt	DMM	0.0001	90000	3e-09	0.06
plume source	Baffin	1e-06	11138.3	1e-11	0.035
plume melt	Baffin	0.0001	11138.3	3e-09	0.035
		He cc	4He/3He	Ne cc	21Ne/22Ne
crust	He based on U-Th and 2Ga	0.001	7.46269e+07	8.74126e-10	0.52
SCLM	Koidu (high Ar)	1	367610	0.25	0.065
SCLM	Kimberley	1	249860	0.25	0.0832039
SCLM	Letseng	1	155269	0.25	0.0951565
SCLM	off craton	1e-05	115000	1e-10	0.071
enriched SCLM	model - 0.5 Gyr	1.76e-05	213243	1e-10	0.105803
enriched SCLM	model - 1 Gyr	2.6e-05	315622	1e-10	0.144334
enriched SCLM	model - 2 Gyr	4.6e-05	560713	1e-10	0.236577
subducted crust	1 Gyr old	3.89892e-06	4.82961e+06	1e-11	0.206224
subducted crust	2 Gyr old	8.8032e-06	1.07527e+07	1e-11	0.429146
DMM	upper mantle	5e-07	90000	5e-12	0.06
kimberlite melt	DMM	0.0001	90000	3e-09	0.06
plume source	Baffin	1e-06	11138.3	1e-11	0.035
plume melt	Baffin	0.0001	11138.3	3e-09	0.035
		He cc	4He/3He	Ne cc	21Ne/22Ne
crust	He based on U-Th and 2Ga	0.001	7.46269e+07	8.74126e-10	0.52
SCLM	Koidu (high Ar)	1	367610	0.25	0.065
SCLM	Kimberley	1	249860	0.25	0.0832039
SCLM	Letseng	1	155269	0.25	0.0951565
SCLM	off craton	1e-05	115000	1e-10	0.071
enriched SCLM	model - 0.5 Gyr	1.76e-05	213243	1e-10	0.105803
enriched SCLM	model - 1 Gyr	2.6e-05	315622	1e-10	0.144334
enriched SCLM	model - 2 Gyr	4.6e-05	560713	1e-10	0.236577
subducted crust	1 Gyr old	3.89892e-06	4.82961e+06	1e-11	0.206224
subducted crust	2 Gyr old	8.8032e-06	1.07527e+07	1e-11	0.429146
DMM	upper mantle	5e-07	90000	5e-12	0.06
kimberlite melt	DMM	0.0001	90000	3e-09	0.06
plume source	Baffin	1e-06	11138.3	1e-11	0.035
plume melt	Baffin	0.0001	11138.3	3e-09	0.035
		He cc	4He/3He	Ne cc	21Ne/22Ne
crust	He based on U-Th and 2Ga	0.001	7.46269e+07	8.74126e-10	0.52
SCLM	Koidu (high Ar)	1	367610	0.25	0.065
SCLM	Kimberley	1	249860	0.25	0.0832039
SCLM	Letseng	1	155269	0.25	0.0951565
SCLM	off craton	1e-05	115000	1e-10	0.071
enriched SCLM	model - 0.5 Gyr	1.76e-05	213243	1e-10	0.105803
enriched SCLM	model - 1 Gyr	2.6e-05	315622	1e-10	0.144334
enriched SCLM	model - 2 Gyr	4.6e-05	560713	1e-10	0.236577
subducted crust	1 Gyr old	3.89892e-06	4.82961e+06	1e-11	0.206224
subducted crust	2 Gyr old	8.8032e-06	1.07527e+07	1e-11	0.429146
DMM	upper mantle	5e-07	90000	5e-12	0.06
kimberlite melt	DMM	0.0001	90000	3e-09	0.06
plume source	Baffin	1e-06	11138.3	1e-11	0.035
plume melt	Baffin	0.0001	11138.3	3e-09	0.035
		He cc	4He/3He	Ne cc	21Ne/22Ne
crust	He based on U-Th and 2Ga	0.001	7.46269e+07	8.74126e-10	0.52
SCLM	Koidu (high Ar)	1	367610	0.25	0.065
SCLM	Kimberley	1	249860	0.25	0.0832039
SCLM	Letseng	1	155269	0.25	0.0951565
SCLM	off craton	1e-05	115000	1e-10	0.071
enriched SCLM	model - 0.5 Gyr	1.76e-05	213243	1e-10	0.105803
enriched SCLM	model - 1 Gyr	2.6e-05	315622	1e-10	0.144334
enriched SCLM	model - 2 Gyr	4.6e-05	560713	1e-10	0.236577
subducted crust	1 Gyr old	3.89892e-06	4.82961e+06	1e-11	0.206224
subducted crust	2 Gyr old	8.8032e-06	1.07527e+07	1e-11	0.429146
DMM	upper mantle	5e-07	90000	5e-12	0.06
kimberlite melt	DMM	0.0001	90000	3e-09	0.06
plume source	Baffin	1e-06	11138.3	1e-11	0.035
plume melt	Baffin	0.0001	11138.3	3e-09	0.035
		He cc	4He/3He	Ne cc	21Ne/22Ne
crust	He based on U-Th and 2Ga	0.001	7.46269e+07	8.74126e-10	0.52
SCLM	Koidu (high Ar)	1	367610	0.25	0.065
SCLM	Kimberley	1	249860	0.25	0.0832039
SCLM	Letseng	1	155269	0.25	0.0951565
SCLM	off craton	1e-05	115000	1e-10	0.071
enriched SCLM	model - 0.5 Gyr	1.76e-05	213243	1e-10	0.105803
enriched SCLM	model - 1 Gyr	2.6e-05	315622	1e-10	0.144334
enriched SCLM	model - 2 Gyr	4.6e-05	560713	1e-10	0.236577
subducted crust	1 Gyr old	3.89892e-06	4.82961e+06	1e-11	0.206224
subducted crust	2 Gyr old	8.8032e-06	1.07527e+07	1e-11	0.429146
DMM	upper mantle	5e-07	90000	5e-12	0.06
kimberlite melt	DMM	0.0001	90000	3e-09	0.06
plume source	Baffin	1e-06	11138.3	1e-11	0.035
plume melt	Baffin	0.0001	11138.3	3e-09	0.035
		He cc	4He/3He	Ne cc	21Ne/22Ne
crust	He based on U-Th and 2Ga	0.001	7.46269e+07	8.74126e-10	0.52
SCLM	Koidu (high Ar)	1	367610	0.25	0.065
SCLM	Kimberley	1	249860	0.25	0.0832039
SCLM	Letseng	1	155269	0.25	0.0951565
SCLM	off craton	1e-05	115000	1e-10	0.071
enriched SCLM	model - 0.5 Gyr	1.76e-05	213243	1e-10	0.105803
enriched SCLM	model - 1 Gyr	2.6e-05	315622	1e-10	0.144334
enriched SCLM	model - 2 Gyr	4.6e-05	560713	1e-10	0.236577
subducted crust	1 Gyr old	3.89892e-06	4.82961e+06	1e-11	0.206224
subducted crust	2 Gyr old	8.8032e-06	1.07527e+07	1e-11	0.429146
DMM	upper mantle	5e-07	90000	5e-12	0.06
kimberlite melt	DMM	0.0001	90000	3e-09	0.06
plume source	Baffin	1e-06	11138.3	1e-11	0.035
plume melt	Baffin	0.0001	11138.3	3e-09	0.035
		He cc	4He/3He	Ne cc	21Ne/22Ne
crust	He based on U-Th and 2Ga	0.001	7.46269e+07	8.74126e-10	0.52
SCLM	Koidu (high Ar)	1	367610	0.25	0.065
SCLM	Kimberley	1	249860	0.25	0.0832039
SCLM	Letseng	1	155269	0.25	0.0951565
SCLM	off craton	1e-05	115000	1e-10	0.071
enriched SCLM	model - 0.5 Gyr	1.76e-05	213243	1e-10	0.105803
enriched SCLM	model - 1 Gyr	2.6e-05	315622	1e-10	0.144334
enriched SCLM	model - 2 Gyr	4.6e-05	560713	1e-10	0.236577
subducted crust	1 Gyr old	3.89892e-06	4.82961e+06	1e-11	0.206224
subducted crust	2 Gyr old	8.8032e-06	1.07527e+07	1e-11	0.429146
DMM	upper mantle	5e-07	90000	5e-12	0.06
kimberlite melt	DMM	0.0001	90000	3e-09	0.06
plume source	Baffin	1e-06	11138.3	1e-11	0.035
plume melt	Baffin	0.0001	11138.3	3e-09	0.035
		He cc	4He/3He	Ne cc	21Ne/22Ne
crust	He based on U-Th and 2Ga	0.001	7.46269e+07	8.74126e-10	0.52
SCLM	Koidu (high Ar)	1	367610	0.25	0.065
SCLM	Kimberley	1	249860	0.25	0.0832039
SCLM	Letseng	1	155269	0.25	0.0951565
SCLM	off craton	1e-05	115000	1e-10	0.071
enriched SCLM	model - 0.5 Gyr	1.76e-05	213243	1e-10	0.105803
enriched SCLM	model - 1 Gyr	2.6e-05	315622	1e-10	0.144334
enriched SCLM	model - 2 Gyr	4.6e-05	560713	1e-10	0.236577
subducted crust	1 Gyr old	3.89892e-06	4.82961e+06	1e-11	0.206224
subducted crust	2 Gyr old	8.8032e-06	1.07527e+07	1e-11	0.429146
DMM	upper mantle	5e-07	90000	5e-12	0.06
kimberlite melt	DMM	0.0001	90000	3e-09	0.06
plume source	Baffin	1e-06	11138.3	1e-11	0.035
plume melt	Baffin	0.0001	11138.3	3e-09	0.035
		He cc	4He/3He	Ne cc	21Ne/22Ne
crust	He based on U-Th and 2Ga	0.001	7.46269e+07	8.74126e-10	0.52
SCLM	Koidu (high Ar)	1	367610	0.25	0.065
SCLM	Kimberley	1	249860	0.25	0.0832039
SCLM	Letseng	1	155269	0.25	0.0951565
SCLM	off craton	1e-05	115000	1e-10	0.071
enriched SCLM	model - 0.5 Gyr	1.76e-05	213243	1e-10	0.105803
enriched SCLM	model - 1 Gyr	2.6e-05	315622	1e-10	0.144334
enriched SCLM	model - 2 Gyr	4.6e-05	560713	1e-10	0.236577
subducted crust	1 Gyr old	3.89892e-06	4.82961e+06	1e-11	0.206224
subducted crust	2 Gyr old	8.8032e-06	1.07527e+07	1e-11	0.429146
DMM	upper mantle	5e-07	90000	5e-12	0.06
kimberlite melt	DMM	0.0001	90000	3e-09	0.06
plume source	Baffin	1e-06	11138.3	1e-11	0.035
plume melt	Baffin	0.0001	11138.3	3e-09	0.035
		He cc	4He/3He	Ne cc	21Ne/22Ne
crust	He based on U-Th and 2Ga	0.001	7.46269e+07	8.74126e-10	0.52
SCLM	Koidu (high Ar)	1	367610	0.25	0.065
SCLM	Kimberley	1	249860	0.25	0.0832039
SCLM	Letseng	1	155269	0.25	0.0951565
SCLM	off craton	1e-05	115000	1e-10	0.071
enriched SCLM	model - 0.5 Gyr	1.76e-05	213243	1e-10	0.105803
enriched SCLM	model - 1 Gyr	2.6e-05	315622	1e-10	0.144334
enriched SCLM	model - 2 Gyr	4.6e-05	560713	1e-10	0.236577
subducted crust	1 Gyr old	3.89892e-06	4.82961e+06	1e-11	0.206224
subducted crust	2 Gyr old	8.8032e-06	1.07527e+07	1e-11	0.429146
DMM	upper mantle	5e-07	90000	5e-12	0.06
kimberlite melt	DMM	0.0001	90000	3e-09	0.06
plume source	Baffin	1e-06	11138.3	1e-11	0.035
plume melt	Baffin	0.0001	11138.3	3e-09	0.035
		He cc	4He/3He	Ne cc	21Ne/22Ne
crust	He based on U-Th and 2Ga	0.001	7.46269e+07	8.74126e-10	0.52
SCLM	Koidu (high Ar)	1	367610	0.25	0.065
SCLM	Kimberley	1	249860	0.25	0.0832039
SCLM	Letseng	1	155269	0.25	0.0951565
SCLM	off craton	1e-05	115000	1e-10	0.071
enriched SCLM	model - 0.5 Gyr	1.76e-05	213243	1e-10	0.105803
enriched SCLM	model - 1 Gyr	2.6e-05	315622	1e-10	0.144334
enriched SCLM	model - 2 Gyr	4.6e-05	560713	1e-10	0.236577
subducted crust	1 Gyr old	3.89892e-06	4.82961e+06	1e-11	0.206224
subducted crust	2 Gyr old	8.8032e-06	1.07527e+07	1e-11	0.429146
DMM	upper mantle	5e-07	90000	5e-12	0.06
kimberlite melt	DMM	0.0001	90000	3e-09	0.06
plume source	Baffin	1e-06	11138.3	1e-11	0.035
plume melt	Baffin	0.0001	11138.3	3e-09	0.035
		He cc	4He/3He	Ne cc	21Ne/22Ne
crust	He based on U-Th and 2Ga	0.001	7.46269e+07	8.74126e-10	0.52
SCLM	Koidu (high Ar)	1	367610	0.25	0.065
SCLM	Kimberley	1	249860	0.25	0.0832039
SCLM	Letseng	1	155269	0.25	0.0951565
SCLM	off craton	1e-05	115000	1e-10	0.071
enriched SCLM	model - 0.5 Gyr	1.76e-05	213243	1e-10	0.105803
enriched SCLM	model - 1 Gyr	2.6e-05	315622	1e-10	0.144334
enriched SCLM	model - 2 Gyr	4.6e-05	560713	1e-10	0.236577
subducted crust	1 Gyr old	3.89892e-06	4.82961e+06	1e-11	0.206224
subducted crust	2 Gyr old	8.8032e-06	1.07527e+07	1e-11	0.429146
DMM	upper mantle	5e-07	90000	5e-12	0.06
kimberlite melt	DMM	0.0001	90000	3e-09	0.06
plume source	Baffin	1e-06	11138.3	1e-11	0.035
plume melt	Baffin	0.0001	11138.3	3e-09	0.035
		He cc	4He/3He	Ne cc	21Ne/22Ne
crust	He based on U-Th and 2Ga	0.001	7.46269e+07	8.74126e-10	0.52
SCLM	Koidu (high Ar)	1	367610	0.25	0.065
SCLM	Kimberley	1	249860	0.25	0.0832039
SCLM	Letseng	1	155269	0.25	0.0951565
SCLM	off craton	1e-05	115000	1e-10	0.071
enriched SCLM	model - 0.5 Gyr	1.76e-05	213243	1e-10	0.105803
enriched SCLM	model - 1 Gyr	2.6e-05	315622	1e-10	0.144334
enriched SCLM	model - 2 Gyr	4.6e-05	560713	1e-10	0.236577
subducted crust	1 Gyr old	3.89892e-06	4.82961e+06	1e-11	0.206224
subducted crust	2 Gyr old	8.8032e-06	1.07527e+07	1e-11	0.429146
DMM	upper mantle	5e-07	90000	5e-12	0.06
kimberlite melt	DMM	0.0001	90000	3e-09	0.06
plume source	Baffin	1e-06	11138.3	1e-11	0.035
plume melt	Baffin	0.0001	11138.3	3e-09	0.035
		He cc	4He/3He	Ne cc	21Ne/22Ne
crust	He based on U-Th and 2Ga	0.001	7.46269e+07	8.74126e-10	0.52
SCLM	Koidu (high Ar)	1	367610	0.25	0.065
SCLM	Kimberley	1	249860	0.25	0.0832039
SCLM	Letseng	1	155269	0.25	0.0951565
SCLM	off craton	1e-05	115000	1e-10	0.071
enriched SCLM	model - 0.5 Gyr	1.76e-05	213243	1e-10	0.105803
enriched SCLM	model - 1 Gyr	2.6e-05	315622	1e-10	0.144334
enriched SCLM	model - 2 Gyr	4.6e-05	560713	1e-10	0.236577
subducted crust	1 Gyr old	3.89892e-06	4.82961e+06	1e-11	0.206224
subducted crust	2 Gyr old	8.8032e-06	1.07527e+07	1e-11	0.429146
DMM	upper mantle	5e-07	90000	5e-12	0.06
kimberlite melt	DMM	0.0001	90000	3e-09	0.06
plume source	Baffin	1e-06	11138.3	1e-11	0.035
plume melt	Baffin	0.0001	11138.3	3e-09	0.035
		He cc	4He/3He	Ne cc	21Ne/22Ne
crust	He based on U-Th and 2Ga	0.001	7.46269e+07	8.74126e-10	0.52
SCLM	Koidu (high Ar)	1	367610	0.25	0.065
SCLM	Kimberley	1	249860	0.25	0.0832039
SCLM	Letseng	1	155269	0.25	0.0951565
SCLM	off craton	1e-05	115000	1e-10	0.071
enriched SCLM	model - 0.5 Gyr	1.76e-05	213243	1e-10	0.105803
enriched SCLM	model - 1 Gyr	2.6e-05	315622	1e-10	0.144334
enriched SCLM	model - 2 Gyr	4.6e-05	560713	1e-10	0.236577
subducted crust	1 Gyr old	3.89892e-06	4.82961e+06	1e-11	0.206224
subducted crust	2 Gyr old	8.8032e-06	1.07527e+07	1e-11	0.429146
DMM	upper mantle	5e-07	90000	5e-12	0.06
kimberlite melt	DMM	0.0001	90000	3e-09	0.06
plume source	Baffin	1e-06	11138.3	1e-11	0.035
plume melt	Baffin	0.0001	11138.3	3e-09	0.035
		He cc	4He/3He	Ne cc	21Ne/22Ne
crust	He based on U-Th and 2Ga	0.001	7.46269e+07	8.74126e-10	0.52
SCLM	Koidu (high Ar)	1	367610	0.25	0.065
SCLM	Kimberley	1	249860	0.25	0.0832039
SCLM	Letseng	1	155269	0.25	0.0951565
SCLM	off craton	1e-05	115000	1e-10	0.071
enriched SCLM	model - 0.5 Gyr	1.76e-05	213243	1e-10	0.105803
enriched SCLM	model - 1 Gyr	2.6e-05	315622	1e-10	0.144334
enriched SCLM	model - 2 Gyr	4.6e-05	560713	1e-10	0.236577
subducted crust	1 Gyr old	3.89892e-06	4.82961e+06	1e-11	0.206224
subducted crust	2 Gyr old	8.8032e-06	1.07527e+07	1e-11	0.429146
DMM	upper mantle	5e-07	90000	5e-12	0.06
kimberlite melt	DMM	0.0001	90000	3e-09	0.06
plume source	Baffin	1e-06	11138.3	1e-11	0.035
plume melt	Baffin	0.0001	11138.3	3e-09	0.035
		He cc	4He/3He	Ne cc	21Ne/22Ne
crust	He based on U-Th and 2Ga	0.001	7.46269e+07	8.74126e-10	0.52
SCLM	Koidu (high Ar)	1	367610	0.25	0.065
SCLM	Kimberley	1	249860	0.25	0.0832039
SCLM	Letseng	1	155269	0.25	0.0951565
SCLM	off craton	1e-05	115000	1e-10	0.071
enriched SCLM	model - 0.5 Gyr	1.76e-05	213243	1e-10	0.105803
enriched SCLM	model - 1 Gyr	2.6e-05	315622	1e-10	0.144334
enriched SCLM	model - 2 Gyr	4.6e-05	560713	1e-10	0.236577
subducted crust	1 Gyr old	3.89892e-06	4.82961e+06	1e-11	0.206224
subducted crust	2 Gyr old	8.8032e-06	1.07527e+07	1e-11	0.429146
DMM	upper mantle	5e-07	90000	5e-12	0.06
kimberlite melt	DMM	0.0001	90000	3e-09	0.06
plume source	Baffin	1e-06	11138.3	1e-11	0.035
plume melt	Baffin	0.0001	11138.3	3e-09	0.035
		He cc	4He/3He	Ne cc	21Ne/22Ne
crust	He based on U-Th and 2Ga	0.001	7.46269e+07	8.74126e-10	0.52
SCLM	Koidu (high Ar)	1	367610	0.25	0.065
SCLM	Kimberley	1	249860	0.25	0.0832039
SCLM	Letseng	1	155269	0.25	0.0951565
SCLM	off craton	1e-05	115000	1e-10	0.071
enriched SCLM	model - 0.5 Gyr	1.76e-05	213243	1e-10	0.105803
enriched SCLM	model - 1 Gyr	2.6e-05	315622	1e-10	0.144334
enriched SCLM	model - 2 Gyr	4.6e-05	560713	1e-10	0.236577
subducted crust	1 Gyr old	3.89892e-06	4.82961e+06	1e-11	0.206224
subducted crust	2 Gyr old	8.8032e-06	1.07527e+07	1e-11	0.429146
DMM	upper mantle	5e-07	90000	5e-12	0.06
kimberlite melt	DMM	0.0001	90000	3e-09	0.06
plume source	Baffin	1e-06	11138.3	1e-11	0.035
plume melt	Baffin	0.0001	11138.3	3e-09	0.035
		He cc	4He/3He	Ne cc	21Ne/22Ne
crust	He based on U-Th and 2Ga	0.001	7.46269e+07	8.74126e-10	0.52
SCLM	Koidu (high Ar)	1	367610	0.25	0.065
SCLM	Kimberley	1	249860	0.25	0.0832039
SCLM	Letseng	1	155269	0.25	0.0951565
SCLM	off craton	1e-05	115000	1e-10	0.071
enriched SCLM	model - 0.5 Gyr	1.76e-05	213243	1e-10	0.105803
enriched SCLM	model - 1 Gyr	2.6e-05	315622	1e-10	0.144334
enriched SCLM	model - 2 Gyr	4.6e-05	560713	1e-10	0.236577
subducted crust	1 Gyr old	3.89892e-06	4.82961e+06	1e-11	0.206224
subducted crust	2 Gyr old	8.8032e-06	1.07527e+07	1e-11	0.429146
DMM	upper mantle	5e-07	90000	5e-12	0.06
kimberlite melt	DMM	0.0001	90000	3e-09	0.06
plume source	Baffin	1e-06	11138.3	1e-11	0.035
plume melt	Baffin	0.0001	11138.3	3e-09	0.035
		He cc	4He/3He	Ne cc	21Ne/22Ne
crust	He based on U-Th and 2Ga	0.001	7.46269e+07	8.74126e-10	0.52
SCLM	Koidu (high Ar)	1	367610	0.25	0.065
SCLM	Kimberley	1	249860	0.25	0.0832039
SCLM	Letseng	1	155269	0.25	0.0951565
SCLM	off craton	1e-05	115000	1e-10	0.071
enriched SCLM	model - 0.5 Gyr	1.76e-05	213243	1e-10	0.105803
enriched SCLM	model - 1 Gyr	2.6e-05	315622	1e-10	0.144334
enriched SCLM	model - 2 Gyr	4.6e-05	560713	1e-10	0.236577
subducted crust	1 Gyr old	3.89892e-06	4.82961e+06	1e-11	0.206224
subducted crust	2 Gyr old	8.8032e-06	1.07527e+07	1e-11	0.429146
DMM	upper mantle	5e-07	90000	5e-12	0.06
kimberlite melt	DMM	0.0001	90000	3e-09	0.06
plume source	Baffin	1e-06	11138.3	1e-11	0.035
plume melt	Baffin	0.0001	11138.3	3e-09	0.035
		He cc	4He/3He	Ne cc	21Ne/22Ne
crust	He based on U-Th and 2Ga	0.001	7.46269e+07	8.74126e-10	0.52
SCLM	Koidu (high Ar)	1	367610	0.25	0.065
SCLM	Kimberley	1	249860	0.25	0.0832039
SCLM	Letseng	1	155269	0.25	0.0951565
SCLM	off craton	1e-05	115000	1e-10	0.071
enriched SCLM	model - 0.5 Gyr	1.76e-05	213243	1e-10	0.105803
enriched SCLM	model - 1 Gyr	2.6e-05	315622	1e-10	0.144334
enriched SCLM	model - 2 Gyr	4.6e-05	560713	1e-10	0.236577
subducted crust	1 Gyr old	3.89892e-06	4.82961e+06	1e-11	0.206224
subducted crust	2 Gyr old	8.8032e-06	1.07527e+07	1e-11	0.429146
DMM	upper mantle	5e-07	90000	5e-12	0.06
kimberlite melt	DMM	0.0001	90000	3e-09	0.06
plume source	Baffin	1e-06	11138.3	1e-11	0.035
plume melt	Baffin	0.0001	11138.3	3e-09	0.035
		He cc	4He/3He	Ne cc	21Ne/22Ne
crust	He based on U-Th and 2Ga	0.001	7.46269e+07	8.74126e-10	0.52
SCLM	Koidu (high Ar)	1	367610	0.25	0.065
SCLM	Kimberley	1	249860	0.25	0.0832039
SCLM	Letseng	1	155269	0.25	0.0951565
SCLM	off craton	1e-05	115000	1e-10	0.071
enriched SCLM	model - 0.5 Gyr	1.76e-05	213243	1e-10	0.105803
enriched SCLM	model - 1 Gyr	2.6e-05	315622	1e-10	0.144334
enriched SCLM	model - 2 Gyr	4.6e-05	560713	1e-10	0.236577
subducted crust	1 Gyr old	3.89892e-06	4.82961e+06	1e-11	0.206224
subducted crust	2 Gyr old	8.8032e-06	1.07527e+07	1e-11	0.429146
DMM	upper mantle	5e-07	90000	5e-12	0.06
kimberlite melt	DMM	0.0001	90000	3e-09	0.06
plume source	Baffin	1e-06	11138.3	1e-11	0.035
plume melt	Baffin	0.0001	11138.3	3e-09	0.035
		He cc	4He/3He	Ne cc	21Ne/22Ne
crust	He based on U-Th and 2Ga	0.001	7.46269e+07	8.74126e-10	0.52
SCLM	Koidu (high Ar)	1	367610	0.25	0.065
SCLM	Kimberley	1	249860	0.25	0.0832039
SCLM	Letseng	1	155269	0.25	0.0951565
SCLM	off craton	1e-05	115000	1e-10	0.071
enriched SCLM	model - 0.5 Gyr	1.76e-05	213243	1e-10	0.105803
enriched SCLM	model - 1 Gyr	2.6e-05	315622	1e-10	0.144334
enriched SCLM	model - 2 Gyr	4.6e-05	560713	1e-10	0.236577
subducted crust	1 Gyr old	3.89892e-06	4.82961e+06	1e-11	0.206224
subducted crust	2 Gyr old	8.8032e-06	1.07527e+07	1e-11	0.429146
DMM	upper mantle	5e-07	90000	5e-12	0.06
kimberlite melt	DMM	0.0001	90000	3e-09	0.06
plume source	Baffin	1e-06	11138.3	1e-11	0.035
plume melt	Baffin	0.0001	11138.3	3e-09	0.035
		He cc	4He/3He	Ne cc	21Ne/22Ne
crust	He based on U-Th and 2Ga	0.001	7.46269e+07	8.74126e-10	0.52
SCLM	Koidu (high Ar)	1	367610	0.25	0.065
SCLM	Kimberley	1	249860	0.25	0.0832039
SCLM	Letseng	1	155269	0.25	0.0951565
SCLM	off craton	1e-05	115000	1e-10	0.071
enriched SCLM	model - 0.5 Gyr	1.76e-05	213243	1e-10	0.105803
enriched SCLM	model - 1 Gyr	2.6e-05	315622	1e-10	0.144334
enriched SCLM	model - 2 Gyr	4.6e-05	560713	1e-10	0.236577
subducted crust	1 Gyr old	3.89892e-06	4.82961e+06	1e-11	0.206224
subducted crust	2 Gyr old	8.8032e-06	1.07527e+07	1e-11	0.429146
DMM	upper mantle	5e-07	90000	5e-12	0.06
kimberlite melt	DMM	0.0001	90000	3e-09	0.06
plume source	Baffin	1e-06	11138.3	1e-11	0.035
plume melt	Baffin	0.0001	11138.3	3e-09	0.035
		He cc	4He/3He	Ne cc	21Ne/22Ne
crust	He based on U-Th and 2Ga	0.001	7.46269e+07	8.74126e-10	0.52
SCLM	Koidu (high Ar)	1	367610	0.25	0.065
SCLM	Kimberley	1	249860	0.25	0.0832039
SCLM	Letseng	1	155269	0.25	0.0951565
SCLM	off craton	1e-05	115000	1e-10	0.071
enriched SCLM	model - 0.5 Gyr	1.76e-05	213243	1e-10	0.105803
enriched SCLM	model - 1 Gyr	2.6e-05	315622	1e-10	0.144334
enriched SCLM	model - 2 Gyr	4.6e-05	560713	1e-10	0.236577
subducted crust	1 Gyr old	3.89892e-06	4.82961e+06	1e-11	0.206224
subducted crust	2 Gyr old	8.8032e-06	1.07527e+07	1e-11	0.429146
DMM	upper mantle	5e-07	90000	5e-12	0.06
kimberlite melt	DMM	0.0001	90000	3e-09	0.06
plume source	Baffin	1e-06	11138.3	1e-11	0.035
plume melt	Baffin	0.0001	11138.3	3e-09	0.035
		He cc	4He/3He	Ne cc	21Ne/22Ne
crust	He based on U-Th and 2Ga	0.001	7.46269e+07	8.74126e-10	0.52
SCLM	Koidu (high Ar)	1	367610	0.25	0.065
SCLM	Kimberley	1	249860	0.25	0.0832039
SCLM	Letseng	1	155269	0.25	0.0951565
SCLM	off craton	1e-05	115000	1e-10	0.071
enriched SCLM	model - 0.5 Gyr	1.76e-05	213243	1e-10	0.105803
enriched SCLM	model - 1 Gyr	2.6e-05	315622	1e-10	0.144334
enriched SCLM	model - 2 Gyr	4.6e-05	560713	1e-10	0.236577
subducted crust	1 Gyr old	3.89892e-06	4.82961e+06	1e-11	0.206224
subducted crust	2 Gyr old	8.8032e-06	1.07527e+07	1e-11	0.429146
DMM	upper mantle	5e-07	90000	5e-12	0.06
kimberlite melt	DMM	0.0001	90000	3e-09	0.06
plume source	Baffin	1e-06	11138.3	1e-11	0.035
plume melt	Baffin	0.0001	11138.3	3e-09	0.035
		He cc	4He/3He	Ne cc	21Ne/22Ne
crust	He based on U-Th and 2Ga	0.001	7.46269e+07	8.74126e-10	0.52
SCLM	Koidu (high Ar)	1	367610	0.25	0.065
SCLM	Kimberley	1	249860	0.25	0.0832039
SCLM	Letseng	1	155269	0.25	0.0951565
SCLM	off craton	1e-05	115000	1e-10	0.071
enriched SCLM	model - 0.5 Gyr	1.76e-05	213243	1e-10	0.105803
enriched SCLM	model - 1 Gyr	2.6e-05	315622	1e-10	0.144334
enriched SCLM	model - 2 Gyr	4.6e-05	560713	1e-10	0.236577
subducted crust	1 Gyr old	3.89892e-06	4.82961e+06	1e-11	0.206224
subducted crust	2 Gyr old	8.8032e-06	1.07527e+07	1e-11	0.429146
DMM	upper mantle	5e-07	90000	5e-12	0.06
kimberlite melt	DMM	0.0001	90000	3e-09	0.06
plume source	Baffin	1e-06	11138.3	1e-11	0.035
plume melt	Baffin	0.0001	11138.3	3e-09	0.035
		He cc	4He/3He	Ne cc	21Ne/22Ne
crust	He based on U-Th and 2Ga	0.001	7.46269e+07	8.74126e-10	0.52
SCLM	Koidu (high Ar)	1	367610	0.25	0.065
SCLM	Kimberley	1	249860	0.25	0.0832039
SCLM	Letseng	1	155269	0.25	0.0951565
SCLM	off craton	1e-05	115000	1e-10	0.071
enriched SCLM	model - 0.5 Gyr	1.76e-05	213243	1e-10	0.105803
enriched SCLM	model - 1 Gyr	2.6e-05	315622	1e-10	0.144334
enriched SCLM	model - 2 Gyr	4.6e-05	560713	1e-10	0.236577
subducted crust	1 Gyr old	3.89892e-06	4.82961e+06	1e-11	0.206224
subducted crust	2 Gyr old	8.8032e-06	1.07527e+07	1e-11	0.429146
DMM	upper mantle	5e-07	90000	5e-12	0.06
kimberlite melt	DMM	0.0001	90000	3e-09	0.06
plume source	Baffin	1e-06	11138.3	1e-11	0.035
plume melt	Baffin	0.0001	11138.3	3e-09	0.035
		He cc	4He/3He	Ne cc	21Ne/22Ne
crust	He based on U-Th and 2Ga	0.001	7.46269e+07	8.74126e-10	0.52
SCLM	Koidu (high Ar)	1	367610	0.25	0.065
SCLM	Kimberley	1	249860	0.25	0.0832039
SCLM	Letseng	1	155269	0.25	0.0951565
SCLM	off craton	1e-05	115000	1e-10	0.071
enriched SCLM	model - 0.5 Gyr	1.76e-05	213243	1e-10	0.105803
enriched SCLM	model - 1 Gyr	2.6e-05	315622	1e-10	0.144334
enriched SCLM	model - 2 Gyr	4.6e-05	560713	1e-10	0.236577
subducted crust	1 Gyr old	3.89892e-06	4.82961e+06	1e-11	0.206224
subducted crust	2 Gyr old	8.8032e-06	1.07527e+07	1e-11	0.429146
DMM	upper mantle	5e-07	90000	5e-12	0.06
kimberlite melt	DMM	0.0001	90000	3e-09	0.06
plume source	Baffin	1e-06	11138.3	1e-11	0.035
plume melt	Baffin	0.0001	11138.3	3e-09	0.035
		He cc	4He/3He	Ne cc	21Ne/22Ne
crust	He based on U-Th and 2Ga	0.001	7.46269e+07	8.74126e-10	0.52
SCLM	Koidu (high Ar)	1	367610	0.25	0.065
SCLM	Kimberley	1	249860	0.25	0.0832039
SCLM	Letseng	1	155269	0.25	0.0951565
SCLM	off craton	1e-05	115000	1e-10	0.071
enriched SCLM	model - 0.5 Gyr	1.76e-05	213243	1e-10	0.105803
enriched SCLM	model - 1 Gyr	2.6e-05	315622	1e-10	0.144334
enriched SCLM	model - 2 Gyr	4.6e-05	560713	1e-10	0.236577
subducted crust	1 Gyr old	3.89892e-06	4.82961e+06	1e-11	0.206224
subducted crust	2 Gyr old	8.8032e-06	1.07527e+07	1e-11	0.429146
DMM	upper mantle	5e-07	90000	5e-12	0.06
kimberlite melt	DMM	0.0001	90000	3e-09	0.06
plume source	Baffin	1e-06	11138.3	1e-11	0.035
plume melt	Baffin	0.0001	11138.3	3e-09	0.035
		He cc	4He/3He	Ne cc	21Ne/22Ne
crust	He based on U-Th and 2Ga	0.001	7.46269e+07	8.74126e-10	0.52
SCLM	Koidu (high Ar)	1	367610	0.25	0.065
SCLM	Kimberley	1	249860	0.25	0.0832039
SCLM	Letseng	1	155269	0.25	0.0951565
SCLM	off craton	1e-05	115000	1e-10	0.071
enriched SCLM	model - 0.5 Gyr	1.76e-05	213243	1e-10	0.105803
enriched SCLM	model - 1 Gyr	2.6e-05	315622	1e-10	0.144334
enriched SCLM	model - 2 Gyr	4.6e-05	560713	1e-10	0.236577
subducted crust	1 Gyr old	3.89892e-06	4.82961e+06	1e-11	0.206224
subducted crust	2 Gyr old	8.8032e-06	1.07527e+07	1e-11	0.429146
DMM	upper mantle	5e-07	90000	5e-12	0.06
kimberlite melt	DMM	0.0001	90000	3e-09	0.06
plume source	Baffin	1e-06	11138.3	1e-11	0.035
plume melt	Baffin	0.0001	11138.3	3e-09	0.035
		He cc	4He/3He	Ne cc	21Ne/22Ne
crust	He based on U-Th and 2Ga	0.001	7.46269e+07	8.74126e-10	0.52
SCLM	Koidu (high Ar)	1	367610	0.25	0.065
SCLM	Kimberley	1	249860	0.25	0.0832039
SCLM	Letseng	1	155269	0.25	0.0951565
SCLM	off craton	1e-05	115000	1e-10	0.071
enriched SCLM	model - 0.5 Gyr	1.76e-05	213243	1e-10	0.105803
enriched SCLM	model - 1 Gyr	2.6e-05	315622	1e-10	0.144334
enriched SCLM	model - 2 Gyr	4.6e-05	560713	1e-10	0.236577
subducted crust	1 Gyr old	3.89892e-06	4.82961e+06	1e-11	0.206224
subducted crust	2 Gyr old	8.8032e-06	1.07527e+07	1e-11	0.429146
DMM	upper mantle	5e-07	90000	5e-12	0.06
kimberlite melt	DMM	0.0001	90000	3e-09	0.06
plume source	Baffin	1e-06	11138.3	1e-11	0.035
plume melt	Baffin	0.0001	11138.3	3e-09	0.035
		He cc	4He/3He	Ne cc	21Ne/22Ne
crust	He based on U-Th and 2Ga	0.001	7.46269e+07	8.74126e-10	0.52
SCLM	Koidu (high Ar)	1	367610	0.25	0.065
SCLM	Kimberley	1	249860	0.25	0.0832039
SCLM	Letseng	1	155269	0.25	0.0951565
SCLM	off craton	1e-05	115000	1e-10	0.071
enriched SCLM	model - 0.5 Gyr	1.76e-05	213243	1e-10	0.105803
enriched SCLM	model - 1 Gyr	2.6e-05	315622	1e-10	0.144334
enriched SCLM	model - 2 Gyr	4.6e-05	560713	1e-10	0.236577
subducted crust	1 Gyr old	3.89892e-06	4.82961e+06	1e-11	0.206224
subducted crust	2 Gyr old	8.8032e-06	1.07527e+07	1e-11	0.429146
DMM	upper mantle	5e-07	90000	5e-12	0.06
kimberlite melt	DMM	0.0001	90000	3e-09	0.06
plume source	Baffin	1e-06	11138.3	1e-11	0.035
plume melt	Baffin	0.0001	11138.3	3e-09	0.035
		He cc	4He/3He	Ne cc	21Ne/22Ne
crust	He based on U-Th and 2Ga	0.001	7.46269e+07	8.74126e-10	0.52
SCLM	Koidu (high Ar)	1	367610	0.25	0.065
SCLM	Kimberley	1	249860	0.25	0.0832039
SCLM	Letseng	1	155269	0.25	0.0951565
SCLM	off craton	1e-05	115000	1e-10	0.071
enriched SCLM	model - 0.5 Gyr	1.76e-05	213243	1e-10	0.105803
enriched SCLM	model - 1 Gyr	2.6e-05	315622	1e-10	0.144334
enriched SCLM	model - 2 Gyr	4.6e-05	560713	1e-10	0.236577
subducted crust	1 Gyr old	3.89892e-06	4.82961e+06	1e-11	0.206224
subducted crust	2 Gyr old	8.8032e-06	1.07527e+07	1e-11	0.429146
DMM	upper mantle	5e-07	90000	5e-12	0.06
kimberlite melt	DMM	0.0001	90000	3e-09	0.06
plume source	Baffin	1e-06	11138.3	1e-11	0.035
plume melt	Baffin	0.0001	11138.3	3e-09	0.035
		He cc	4He/3He	Ne cc	21Ne/22Ne
crust	He based on U-Th and 2Ga	0.001	7.46269e+07	8.74126e-10	0.52
SCLM	Koidu (high Ar)	1	367610	0.25	0.065
SCLM	Kimberley	1	249860	0.25	0.0832039
SCLM	Letseng	1	155269	0.25	0.0951565
SCLM	off craton	1e-05	115000	1e-10	0.071
enriched SCLM	model - 0.5 Gyr	1.76e-05	213243	1e-10	0.105803
enriched SCLM	model - 1 Gyr	2.6e-05	315622	1e-10	0.144334
enriched SCLM	model - 2 Gyr	4.6e-05	560713	1e-10	0.236577
subducted crust	1 Gyr old	3.89892e-06	4.82961e+06	1e-11	0.206224
subducted crust	2 Gyr old	8.8032e-06	1.07527e+07	1e-11	0.429146
DMM	upper mantle	5e-07	90000	5e-12	0.06
kimberlite melt	DMM	0.0001	90000	3e-09	0.06
plume source	Baffin	1e-06	11138.3	1e-11	0.035
plume melt	Baffin	0.0001	11138.3	3e-09	0.035
		He cc	4He/3He	Ne cc	21Ne/22Ne
crust	He based on U-Th and 2Ga	0.001	7.46269e+07	8.74126e-10	0.52
SCLM	Koidu (high Ar)	1	367610	0.25	0.065
SCLM	Kimberley	1	249860	0.25	0.0832039
SCLM	Letseng	1	155269	0.25	0.0951565
SCLM	off craton	1e-05	115000	1e-10	0.071
enriched SCLM	model - 0.5 Gyr	1.76e-05	213243	1e-10	0.105803
enriched SCLM	model - 1 Gyr	2.6e-05	315622	1e-10	0.144334
enriched SCLM	model - 2 Gyr	4.6e-05	560713	1e-10	0.236577
subducted crust	1 Gyr old	3.89892e-06	4.82961e+06	1e-11	0.206224
subducted crust	2 Gyr old	8.8032e-06	1.07527e+07	1e-11	0.429146
DMM	upper mantle	5e-07	90000	5e-12	0.06
kimberlite melt	DMM	0.0001	90000	3e-09	0.06
plume source	Baffin	1e-06	11138.3	1e-11	0.035
plume melt	Baffin	0.0001	11138.3	3e-09	0.035
		He cc	4He/3He	Ne cc	21Ne/22Ne
crust	He based on U-Th and 2Ga	0.001	7.46269e+07	8.74126e-10	0.52
SCLM	Koidu (high Ar)	1	367610	0.25	0.065
SCLM	Kimberley	1	249860	0.25	0.0832039
SCLM	Letseng	1	155269	0.25	0.0951565
SCLM	off craton	1e-05	115000	1e-10	0.071
enriched SCLM	model - 0.5 Gyr	1.76e-05	213243	1e-10	0.105803
enriched SCLM	model - 1 Gyr	2.6e-05	315622	1e-10	0.144334
enriched SCLM	model - 2 Gyr	4.6e-05	560713	1e-10	0.236577
subducted crust	1 Gyr old	3.89892e-06	4.82961e+06	1e-11	0.206224
subducted crust	2 Gyr old	8.8032e-06	1.07527e+07	1e-11	0.429146
DMM	upper mantle	5e-07	90000	5e-12	0.06
kimberlite melt	DMM	0.0001	90000	3e-09	0.06
plume source	Baffin	1e-06	11138.3	1e-11	0.035
plume melt	Baffin	0.0001	11138.3	3e-09	0.035
		He cc	4He/3He	Ne cc	21Ne/22Ne
crust	He based on U-Th and 2Ga	0.001	7.46269e+07	8.74126e-10	0.52
SCLM	Koidu (high Ar)	1	367610	0.25	0.065
SCLM	Kimberley	1	249860	0.25	0.0832039
SCLM	Letseng	1	155269	0.25	0.0951565
SCLM	off craton	1e-05	115000	1e-10	0.071
enriched SCLM	model - 0.5 Gyr	1.76e-05	213243	1e-10	0.105803
enriched SCLM	model - 1 Gyr	2.6e-05	315622	1e-10	0.144334
enriched SCLM	model - 2 Gyr	4.6e-05	560713	1e-10	0.236577
subducted crust	1 Gyr old	3.89892e-06	4.82961e+06	1e-11	0.206224
subducted crust	2 Gyr old	8.8032e-06	1.07527e+07	1e-11	0.429146
DMM	upper mantle	5e-07	90000	5e-12	0.06
kimberlite melt	DMM	0.0001	90000	3e-09	0.06
plume source	Baffin	1e-06	11138.3	1e-11	0.035
plume melt	Baffin	0.0001	11138.3	3e-09	0.035
		He cc	4He/3He	Ne cc	21Ne/22Ne
crust	He based on U-Th and 2Ga	0.001	7.46269e+07	8.74126e-10	0.52
SCLM	Koidu (high Ar)	1	367610	0.25	0.065
SCLM	Kimberley	1	249860	0.25	0.0832039
SCLM	Letseng	1	155269	0.25	0.0951565
SCLM	off craton	1e-05	115000	1e-10	0.071
enriched SCLM	model - 0.5 Gyr	1.76e-05	213243	1e-10	0.105803
enriched SCLM	model - 1 Gyr	2.6e-05	315622	1e-10	0.144334
enriched SCLM	model - 2 Gyr	4.6e-05	560713	1e-10	0.236577
subducted crust	1 Gyr old	3.89892e-06	4.82961e+06	1e-11	0.206224
subducted crust	2 Gyr old	8.8032e-06	1.07527e+07	1e-11	0.429146
DMM	upper mantle	5e-07	90000	5e-12	0.06
kimberlite melt	DMM	0.0001	90000	3e-09	0.06
plume source	Baffin	1e-06	11138.3	1e-11	0.035
plume melt	Baffin	0.0001	11138.3	3e-09	0.035
		He cc	4He/3He	Ne cc	21Ne/22Ne
crust	He based on U-Th and 2Ga	0.001	7.46269e+07	8.74126e-10	0.52
SCLM	Koidu (high Ar)	1	367610	0.25	0.065
SCLM	Kimberley	1	249860	0.25	0.0832039
SCLM	Letseng	1	155269	0.25	0.0951565
SCLM	off craton	1e-05	115000	1e-10	0.071
enriched SCLM	model - 0.5 Gyr	1.76e-05	213243	1e-10	0.105803
enriched SCLM	model - 1 Gyr	2.6e-05	315622	1e-10	0.144334
enriched SCLM	model - 2 Gyr	4.6e-05	560713	1e-10	0.236577
subducted crust	1 Gyr old	3.89892e-06	4.82961e+06	1e-11	0.206224
subducted crust	2 Gyr old	8.8032e-06	1.07527e+07	1e-11	0.429146
DMM	upper mantle	5e-07	90000	5e-12	0.06
kimberlite melt	DMM	0.0001	90000	3e-09	0.06
plume source	Baffin	1e-06	11138.3	1e-11	0.035
plume melt	Baffin	0.0001	11138.3	3e-09	0.035
		He cc	4He/3He	Ne cc	21Ne/22Ne
crust	He based on U-Th and 2Ga	0.001	7.46269e+07	8.74126e-10	0.52
SCLM	Koidu (high Ar)	1	367610	0.25	0.065
SCLM	Kimberley	1	249860	0.25	0.0832039
SCLM	Letseng	1	155269	0.25	0.0951565
SCLM	off craton	1e-05	115000	1e-10	0.071
enriched SCLM	model - 0.5 Gyr	1.76e-05	213243	1e-10	0.105803
enriched SCLM	model - 1 Gyr	2.6e-05	315622	1e-10	0.144334
enriched SCLM	model - 2 Gyr	4.6e-05	560713	1e-10	0.236577
subducted crust	1 Gyr old	3.89892e-06	4.82961e+06	1e-11	0.206224
subducted crust	2 Gyr old	8.8032e-06	1.07527e+07	1e-11	0.429146
DMM	upper mantle	5e-07	90000	5e-12	0.06
kimberlite melt	DMM	0.0001	90000	3e-09	0.06
plume source	Baffin	1e-06	11138.3	1e-11	0.035
plume melt	Baffin	0.0001	11138.3	3e-09	0.035
		He cc	4He/3He	Ne cc	21Ne/22Ne
crust	He based on U-Th and 2Ga	0.001	7.46269e+07	8.74126e-10	0.52
SCLM	Koidu (high Ar)	1	367610	0.25	0.065
SCLM	Kimberley	1	249860	0.25	0.0832039
SCLM	Letseng	1	155269	0.25	0.0951565
SCLM	off craton	1e-05	115000	1e-10	0.071
enriched SCLM	model - 0.5 Gyr	1.76e-05	213243	1e-10	0.105803
enriched SCLM	model - 1 Gyr	2.6e-05	315622	1e-10	0.144334
enriched SCLM	model - 2 Gyr	4.6e-05	560713	1e-10	0.236577
subducted crust	1 Gyr old	3.89892e-06	4.82961e+06	1e-11	0.206224
subducted crust	2 Gyr old	8.8032e-06	1.07527e+07	1e-11	0.429146
DMM	upper mantle	5e-07	90000	5e-12	0.06
kimberlite melt	DMM	0.0001	90000	3e-09	0.06
plume source	Baffin	1e-06	11138.3	1e-11	0.035
plume melt	Baffin	0.0001	11138.3	3e-09	0.035
		He cc	4He/3He	Ne cc	21Ne/22Ne
crust	He based on U-Th and 2Ga	0.001	7.46269e+07	8.74126e-10	0.52
SCLM	Koidu (high Ar)	1	367610	0.25	0.065
SCLM	Kimberley	1	249860	0.25	0.0832039
SCLM	Letseng	1	155269	0.25	0.0951565
SCLM	off craton	1e-05	115000	1e-10	0.071
enriched SCLM	model - 0.5 Gyr	1.76e-05	213243	1e-10	0.105803
enriched SCLM	model - 1 Gyr	2.6e-05	315622	1e-10	0.144334
enriched SCLM	model - 2 Gyr	4.6e-05	560713	1e-10	0.236577
subducted crust	1 Gyr old	3.89892e-06	4.82961e+06	1e-11	0.206224
subducted crust	2 Gyr old	8.8032e-06	1.07527e+07	1e-11	0.429146
DMM	upper mantle	5e-07	90000	5e-12	0.06
kimberlite melt	DMM	0.0001	90000	3e-09	0.06
plume source	Baffin	1e-06	11138.3	1e-11	0.035
plume melt	Baffin	0.0001	11138.3	3e-09	0.035
		He cc	4He/3He	Ne cc	21Ne/22Ne
crust	He based on U-Th and 2Ga	0.001	7.46269e+07	8.74126e-10	0.52
SCLM	Koidu (high Ar)	1	367610	0.25	0.065
SCLM	Kimberley	1	249860	0.25	0.0832039
SCLM	Letseng	1	155269	0.25	0.0951565
SCLM	off craton	1e-05	115000	1e-10	0.071
enriched SCLM	model - 0.5 Gyr	1.76e-05	213243	1e-10	0.105803
enriched SCLM	model - 1 Gyr	2.6e-05	315622	1e-10	0.144334
enriched SCLM	model - 2 Gyr	4.6e-05	560713	1e-10	0.236577
subducted crust	1 Gyr old	3.89892e-06	4.82961e+06	1e-11	0.206224
subducted crust	2 Gyr old	8.8032e-06	1.07527e+07	1e-11	0.429146
DMM	upper mantle	5e-07	90000	5e-12	0.06
kimberlite melt	DMM	0.0001	90000	3e-09	0.06
plume source	Baffin	1e-06	11138.3	1e-11	0.035
plume melt	Baffin	0.0001	11138.3	3e-09	0.035
		He cc	4He/3He	Ne cc	21Ne/22Ne
crust	He based on U-Th and 2Ga	0.001	7.46269e+07	8.74126e-10	0.52
SCLM	Koidu (high Ar)	1	367610	0.25	0.065
SCLM	Kimberley	1	249860	0.25	0.0832039
SCLM	Letseng	1	155269	0.25	0.0951565
SCLM	off craton	1e-05	115000	1e-10	0.071
enriched SCLM	model - 0.5 Gyr	1.76e-05	213243	1e-10	0.105803
enriched SCLM	model - 1 Gyr	2.6e-05	315622	1e-10	0.144334
enriched SCLM	model - 2 Gyr	4.6e-05	560713	1e-10	0.236577
subducted crust	1 Gyr old	3.89892e-06	4.82961e+06	1e-11	0.206224
subducted crust	2 Gyr old	8.8032e-06	1.07527e+07	1e-11	0.429146
DMM	upper mantle	5e-07	90000	5e-12	0.06
kimberlite melt	DMM	0.0001	90000	3e-09	0.06
plume source	Baffin	1e-06	11138.3	1e-11	0.035
plume melt	Baffin	0.0001	11138.3	3e-09	0.035
		He cc	4He/3He	Ne cc	21Ne/22Ne
crust	He based on U-Th and 2Ga	0.001	7.46269e+07	8.74126e-10	0.52
SCLM	Koidu (high Ar)	1	367610	0.25	0.065
SCLM	Kimberley	1	249860	0.25	0.0832039
SCLM	Letseng	1	155269	0.25	0.0951565
SCLM	off craton	1e-05	115000	1e-10	0.071
enriched SCLM	model - 0.5 Gyr	1.76e-05	213243	1e-10	0.105803
enriched SCLM	model - 1 Gyr	2.6e-05	315622	1e-10	0.144334
enriched SCLM	model - 2 Gyr	4.6e-05	560713	1e-10	0.236577
subducted crust	1 Gyr old	3.89892e-06	4.82961e+06	1e-11	0.206224
subducted crust	2 Gyr old	8.8032e-06	1.07527e+07	1e-11	0.429146
DMM	upper mantle	5e-07	90000	5e-12	0.06
kimberlite melt	DMM	0.0001	90000	3e-09	0.06
plume source	Baffin	1e-06	11138.3	1e-11	0.035
plume melt	Baffin	0.0001	11138.3	3e-09	0.035
		He cc	4He/3He	Ne cc	21Ne/22Ne
crust	He based on U-Th and 2Ga	0.001	7.46269e+07	8.74126e-10	0.52
SCLM	Koidu (high Ar)	1	367610	0.25	0.065
SCLM	Kimberley	1	249860	0.25	0.0832039
SCLM	Letseng	1	155269	0.25	0.0951565
SCLM	off craton	1e-05	115000	1e-10	0.071
enriched SCLM	model - 0.5 Gyr	1.76e-05	213243	1e-10	0.105803
enriched SCLM	model - 1 Gyr	2.6e-05	315622	1e-10	0.144334
enriched SCLM	model - 2 Gyr	4.6e-05	560713	1e-10	0.236577
subducted crust	1 Gyr old	3.89892e-06	4.82961e+06	1e-11	0.206224
subducted crust	2 Gyr old	8.8032e-06	1.07527e+07	1e-11	0.429146
DMM	upper mantle	5e-07	90000	5e-12	0.06
kimberlite melt	DMM	0.0001	90000	3e-09	0.06
plume source	Baffin	1e-06	11138.3	1e-11	0.035
plume melt	Baffin	0.0001	11138.3	3e-09	0.035
		He cc	4He/3He	Ne cc	21Ne/22Ne
crust	He based on U-Th and 2Ga	0.001	7.46269e+07	8.74126e-10	0.52
SCLM	Koidu (high Ar)	1	367610	0.25	0.065
SCLM	Kimberley	1	249860	0.25	0.0832039
SCLM	Letseng	1	155269	0.25	0.0951565
SCLM	off craton	1e-05	115000	1e-10	0.071
enriched SCLM	model - 0.5 Gyr	1.76e-05	213243	1e-10	0.105803
enriched SCLM	model - 1 Gyr	2.6e-05	315622	1e-10	0.144334
enriched SCLM	model - 2 Gyr	4.6e-05	560713	1e-10	0.236577
subducted crust	1 Gyr old	3.89892e-06	4.82961e+06	1e-11	0.206224
subducted crust	2 Gyr old	8.8032e-06	1.07527e+07	1e-11	0.429146
DMM	upper mantle	5e-07	90000	5e-12	0.06
kimberlite melt	DMM	0.0001	90000	3e-09	0.06
plume source	Baffin	1e-06	11138.3	1e-11	0.035
plume melt	Baffin	0.0001	11138.3	3e-09	0.035
		He cc	4He/3He	Ne cc	21Ne/22Ne
crust	He based on U-Th and 2Ga	0.001	7.46269e+07	8.74126e-10	0.52
SCLM	Koidu (high Ar)	1	367610	0.25	0.065
SCLM	Kimberley	1	249860	0.25	0.0832039
SCLM	Letseng	1	155269	0.25	0.0951565
SCLM	off craton	1e-05	115000	1e-10	0.071
enriched SCLM	model - 0.5 Gyr	1.76e-05	213243	1e-10	0.105803
enriched SCLM	model - 1 Gyr	2.6e-05	315622	1e-10	0.144334
enriched SCLM	model - 2 Gyr	4.6e-05	560713	1e-10	0.236577
subducted crust	1 Gyr old	3.89892e-06	4.82961e+06	1e-11	0.206224
subducted crust	2 Gyr old	8.8032e-06	1.07527e+07	1e-11	0.429146
DMM	upper mantle	5e-07	90000	5e-12	0.06
kimberlite melt	DMM	0.0001	90000	3e-09	0.06
plume source	Baffin	1e-06	11138.3	1e-11	0.035
plume melt	Baffin	0.0001	11138.3	3e-09	0.035
		He cc	4He/3He	Ne cc	21Ne/22Ne
crust	He based on U-Th and 2Ga	0.001	7.46269e+07	8.74126e-10	0.52
SCLM	Koidu (high Ar)	1	367610	0.25	0.065
SCLM	Kimberley	1	249860	0.25	0.0832039
SCLM	Letseng	1	155269	0.25	0.0951565
SCLM	off craton	1e-05	115000	1e-10	0.071
enriched SCLM	model - 0.5 Gyr	1.76e-05	213243	1e-10	0.105803
enriched SCLM	model - 1 Gyr	2.6e-05	315622	1e-10	0.144334
enriched SCLM	model - 2 Gyr	4.6e-05	560713	1e-10	0.236577
subducted crust	1 Gyr old	3.89892e-06	4.82961e+06	1e-11	0.206224
subducted crust	2 Gyr old	8.8032e-06	1.07527e+07	1e-11	0.429146
DMM	upper mantle	5e-07	90000	5e-12	0.06
kimberlite melt	DMM	0.0001	90000	3e-09	0.06
plume source	Baffin	1e-06	11138.3	1e-11	0.035
plume melt	Baffin	0.0001	11138.3	3e-09	0.035
